1 **Phosphorus availability and arbuscular mycorrhizal fungi limit soil C cycling and**  
2 **influence plant responses to elevated CO<sub>2</sub> conditions.**

3 Castañeda-Gómez L.<sup>1\*</sup>, Powell J.R.<sup>1</sup>, Pendall E.<sup>1</sup>, Carrillo Y.<sup>1</sup>.

4 <sup>1</sup>Hawkesbury Institute for the Environment, Western Sydney University, Penrith, NSW,  
5 Australia.

6 \* Corresponding author. Current affiliation: Department of Physical and Environmental  
7 Sciences, University of Toronto Scarborough, 1265 Military Trail, Toronto, ON, M1C 1A4,  
8 Canada

9 **Abstract**

10 Enhanced soil organic matter (SOM) decomposition and organic phosphorus (P) cycling may  
11 help sustain plant productivity under elevated CO<sub>2</sub> (eCO<sub>2</sub>) and P-limiting conditions. P-  
12 acquisition by arbuscular mycorrhizal (AM) fungi and their impacts on SOM decomposition  
13 may become even more relevant in these conditions. Yet, experimental evidence of the  
14 interactive effect of AM fungi and P availability influencing altered SOM cycling under  
15 eCO<sub>2</sub> is scarce and the mechanisms of this control are poorly understood. Here, we performed  
16 a pot experiment manipulating P availability, AM fungal presence and atmospheric CO<sub>2</sub>  
17 levels and assessed their impacts on soil C cycling and plant growth. Plants were grown in  
18 chambers with a continuous <sup>13</sup>C-input that allowed differentiation between plant- and SOM-  
19 derived fractions of respired CO<sub>2</sub> (R), dissolved organic C (DOC) and microbial biomass  
20 (MBC) as relevant C pools in the soil C cycle. We hypothesised that under low P availability,  
21 increases in SOM cycling may support sustained plant growth under eCO<sub>2</sub> and that AM fungi  
22 would intensify this effect. We found the impacts of CO<sub>2</sub> enrichment and P availability on  
23 soil C cycling were generally independent of each other with higher root biomass and slight  
24 increases in soil C cycling under eCO<sub>2</sub> occurring regardless of the P treatment. Contrary to  
25 our hypotheses, soil C cycling was enhanced with P addition suggesting that low P conditions

26 were limiting soil C cycling. eCO<sub>2</sub> conditions increased the fraction of SOM-derived DOC  
27 pointing to increased SOM decomposition with eCO<sub>2</sub>. Finally, AM fungi increased microbial  
28 biomass under eCO<sub>2</sub> conditions and low-P without enhanced soil C cycling, probably due to  
29 competitive interactions with free-living microorganisms over nutrients. Our findings in this  
30 plant-soil system suggest that, contrary to what has been reported for N-limited systems, the  
31 impacts of eCO<sub>2</sub> and P availability on soil C cycling are independent of each other.  
32 **Keywords:** Elevated CO<sub>2</sub>, Soil organic matter, decomposition, isotopic natural abundance,  
33 phosphorus limitation, fertilisation effect, mycorrhizal fungi, carbon pools.

## 34 1. Introduction

35 The effect of increased atmospheric CO<sub>2</sub> concentrations on plant productivity and its  
36 potential impacts on soil carbon (C) are regulated by nutrient availability (Ainsworth and  
37 Long, 2004; Finzi et al., 2011; Reich et al., 2014; Terrer et al., 2019). Higher plant  
38 productivity and increases in soil C with elevated CO<sub>2</sub> (eCO<sub>2</sub>) have been observed when  
39 combined with nutrient addition (De Graaff et al., 2006; Dieleman et al., 2010; Hungate et  
40 al., 2009; Maroco et al., 2002; Piñeiro et al., 2017; van Groenigen et al., 2006). In the  
41 absence of external nutrient supplies, higher soil organic matter (SOM) decomposition under  
42 eCO<sub>2</sub> contributes to meet plant nutrient demands with negative impacts on soil C (Carrillo et  
43 al., 2014; Drake et al., 2011; Finzi et al., 2006; Hoosbeek et al., 2004; Phillips et al., 2012;  
44 Reich et al., 2006). However, a pre-existent nutrient limitation may constrain productivity  
45 responses to eCO<sub>2</sub> (Ellsworth et al., 2017; Reed et al., 2015; Reich et al., 2006), potentially  
46 preventing any changes in soil C. The current understanding about nutrient availability  
47 regulating eCO<sub>2</sub> impacts on C cycling has been obtained mainly from northern hemisphere  
48 systems, where nitrogen (N) often constrains ecosystem productivity. But the impacts of  
49 eCO<sub>2</sub> on soil C may be dependent on what the most limiting nutrient is (Dijkstra et al., 2013).  
50 Phosphorus-limited tropical and subtropical ecosystems are relevant C sinks that cover a vast  
51 area (Keenan et al., 2015; Pan et al., 2011; Soepadmo, 1993) and although the role of P  
52 availability regulating the impact of eCO<sub>2</sub> on soil C storage is broadly recognised (Goll et al.,  
53 2012; Reed et al., 2015; Sun et al., 2017; Vitousek et al., 2010), the mechanisms of this  
54 control are poorly understood (Ellsworth et al., 2017; Norby et al., 2015; Terrer et al., 2019).

55 Opposite to N, soil P cycling is less coupled to soil C dynamics because P mobilisation is  
56 not necessarily linked with SOM decomposition. P cycling can be divided into inorganic and  
57 organic sub-cycles (Liu and Chen, 2008; Mullen, 2005). In the inorganic sub-cycle,  
58 mobilisation of inorganic P occurs via biochemical mechanisms without SOM mineralisation

59 nor CO<sub>2</sub> production, thus C and P cycles are not coupled. In the organic P sub-cycle, C and P  
60 cycles are more coupled and P mineralisation occurs via biological mechanisms that lead to  
61 SOM decomposition and CO<sub>2</sub> production (McGill and Cole, 1981; Sharma et al., 2013; Tate,  
62 1984). Most P is made available via inorganic P mobilisation, particularly with P sufficiency.  
63 But in low-P systems, mineral P sources are depleted and P derived from rock weathering is  
64 minimal (Goll et al., 2012; Reed et al., 2011). Therefore, the majority of P acquisition occurs  
65 via internal recycling of organic P sources (Fox et al., 2011; Johnson et al., 2003; Reed et al.,  
66 2011) involving SOM decomposition and CO<sub>2</sub> production. Most of the research on the effects  
67 of eCO<sub>2</sub> on soil P availability are focused on its impacts on inorganic P cycling via  
68 biochemical P mobilisation mechanisms. For example, higher microbial P enzymatic activity  
69 is reported with eCO<sub>2</sub> (Hasegawa et al., 2016; Kelley et al., 2011; Moorhead and Linkins,  
70 1997; Souza et al., 2017) as well as higher production of organic acids and siderophores  
71 involved in P mobilisation (Fransson and Johansson, 2010; Högy et al., 2010; Tarnawski and  
72 Aragno, 2006; Watt and Evans, 1999). Moreover, increases in fine root production and  
73 changes in pH and soil moisture with eCO<sub>2</sub> can indirectly enhance inorganic P cycling in  
74 soils (Dijkstra et al., 2012; Hasegawa et al., 2016; Jin et al., 2015). It is likely that organic P  
75 cycling is also affected by eCO<sub>2</sub> due to the influence of eCO<sub>2</sub> on ecosystem stoichiometry  
76 (Gifford et al., 2000; Loladze, 2014, 2002) but experimental evidence for this is scarce. A  
77 better understanding about how eCO<sub>2</sub> and P availability influence soil C cycling is important  
78 to better predict changes in global soil C due to eCO<sub>2</sub> (Finzi et al., 2011; Goll et al., 2012;  
79 Yang et al., 2016).

80 In low-P conditions, organic P cycling may help sustain plant productivity under eCO<sub>2</sub> at  
81 the expense of higher SOM decomposition. A study by Jing et al, (2017) demonstrated that  
82 inputs of labile C led to higher SOM decomposition in low-P soils mediated by altered  
83 microbial community composition and increases in microbial biomass. Thus, as C allocation

84 belowground increases with eCO<sub>2</sub> (Canadell et al., 1995; Cotrufo and Gorissen, 1997; Pausch  
85 and Kuzyakov, 2018), the higher labile C availability, increased microbial biomass and  
86 activity and higher SOM decomposition may allow for a sustained nutrient release for plant  
87 uptake and growth in low-P soils. However, evidence from field experiments exposed to  
88 eCO<sub>2</sub> suggests that under P-limiting conditions, changes in soil C cycling are minor or  
89 undetected (Castañeda-Gómez et al., 2020; Dijkstra et al., 2013; Drake et al., 2016) and that  
90 the CO<sub>2</sub> fertilization effect is reduced or not observed (Conroy et al., 1992; Deng et al., 2015;  
91 Ellsworth et al., 2017; Goll et al., 2012; Peñuelas et al., 2012; Zhang et al., 2014). Thus, if P  
92 availability becomes limiting, ecosystem productivity and microbial-mediated SOM  
93 decomposition may be hampered, preventing further changes in soil C cycling. Soil microbial  
94 communities play a key role in SOM decomposition and both biological and biochemical P  
95 mineralisation and mobilisation. Moreover, the responses of SOM decomposition and C  
96 stabilisation to P availability have been found to be largely mediated by changes in  
97 saprotrophic microbial community composition and activity (Fang et al., 2019; Feng and  
98 Zhu, 2019; Liu et al., 2018; Soong et al., 2018; Yuan et al., 2021) and by symbiotic fungi  
99 such as arbuscular mycorrhizal (AM) fungi (Xu et al., 2018). Yet the role of saprotrophic and  
100 mycorrhizal fungi altering SOM decomposition under eCO<sub>2</sub> conditions and low-P availability  
101 is poorly understood.

102 AM fungi are known to greatly contribute to P mobilisation under eCO<sub>2</sub> conditions,  
103 especially in ecosystems with low soil P availability (Delucia et al., 1997; Matamala and  
104 Schlesinger, 2000; Terrer et al., 2016) where AM fungi tend to be more abundant (Treseder  
105 and Cross, 2006). AM fungi also alleviate P limitation conditions for plants (Soka and  
106 Ritchie, 2014; Willis et al., 2013) possibly via excretion of P hydrolytic enzymes (Joner et  
107 al., 2000; Sato et al., 2015) and certainly via uptake of inorganic nutrients from the soil  
108 solution (Javot et al., 2007; Smith et al., 2011). They have also been linked with increased

109 SOM decomposition and changes in soil C cycling with climate change (Carrillo et al., 2015;  
110 Cheng et al., 2012; Talbot et al., 2008; Wei et al., 2019). Higher C transfer to AM fungi  
111 under eCO<sub>2</sub> enhances AM fungi growth and activity (Mohan et al., 2014) and so their  
112 contribution to plant P acquisition in P-limited ecosystems may be enhanced with eCO<sub>2</sub>  
113 (Cavagnaro et al., 2011). On the other hand, AM fungi can also suppress eCO<sub>2</sub>-mediated  
114 increases in plant growth due to increased P immobilisation in AM fungal biomass and  
115 increased competition over P with saprotrophic communities (Jin et al., 2015) that can  
116 simultaneously decrease AM fungi-mediated SOM decomposition (Talbot et al., 2008). If P  
117 availability is low, the role of AM fungi mobilising P and promoting plant growth may be  
118 constrained due to P-limitation (Treseder and Allen, 2002), which might further regulate  
119 impacts of eCO<sub>2</sub> on ecosystem productivity in P-limited ecosystems. Due to the significant  
120 role of AM fungi on P and SOM dynamics, predictions of altered soil C stocks under eCO<sub>2</sub>  
121 require an understanding how eCO<sub>2</sub> can change AM fungal activity, their impact on  
122 saprotrophic communities and plant responses to eCO<sub>2</sub>, particularly under P limitation.

123 In this study, we explored the role of P availability and AM fungi mediating responses of  
124 SOM decomposition and plant productivity to eCO<sub>2</sub>. We did this by manipulating P  
125 availability, AM fungal presence and atmospheric CO<sub>2</sub> levels in a pot experiment. An  
126 Australian native grass species (*Microlaena stipoides*) with the ability to grow in a wide  
127 range of P availability conditions and forming arbuscular mycorrhizal associations (Clark et  
128 al., 2014; Hill et al., 2010) was grown in chambers that allowed the continuous isotopic  
129 labelling of plant tissues so we could directly assess changes in SOM-derived C in different C  
130 pools: respired CO<sub>2</sub> (R; the product of decomposition), dissolved organic C (DOC;  
131 considered an active pool of C) and microbial biomass C (MBC; the agent of SOM  
132 decomposition). This approach allowed for a holistic assessment of the impact of eCO<sub>2</sub>, P  
133 availability and AM fungal presence on soil C cycling and plant growth. Changes in

134 saprotrophic communities were also measured (using phospholipid fatty acids) in relation to  
135 eCO<sub>2</sub> conditions, P treatment and AM fungal presence. These responses, along with nutrient  
136 contents in plant tissues and soil extracts (dissolved nutrients), were collected to enhance  
137 result interpretations.

138 We hypothesised that for plants grown under eCO<sub>2</sub> and enhanced P availability –  
139 achieved by P addition – a fertilisation effect would be observed as increased plant biomass  
140 without changes in SOM decomposition (**Figure 1A**) since P addition will allow for plant  
141 requirements to be met under eCO<sub>2</sub>. Contrarily, if P is low, an eCO<sub>2</sub> fertilisation effect would  
142 only occur with increases in SOM decomposition, evidenced as higher SOM-derived respired  
143 CO<sub>2</sub>, MB and MB (**Figure 1B**). Alternatively, we hypothesised that no fertilisation effect  
144 would be observed if soil C and P cycling are decoupled in this experimental system (**Figure**  
145 **1C**). The presence of AM fungi would increase SOM decomposition as a mechanism to  
146 obtain P from SOM via changes in saprotrophic communities. This effect will be observed in  
147 the different C pools, particularly with low P conditions and eCO<sub>2</sub> since both low P  
148 availability and eCO<sub>2</sub> promote AM fungal colonisation rates and activity.



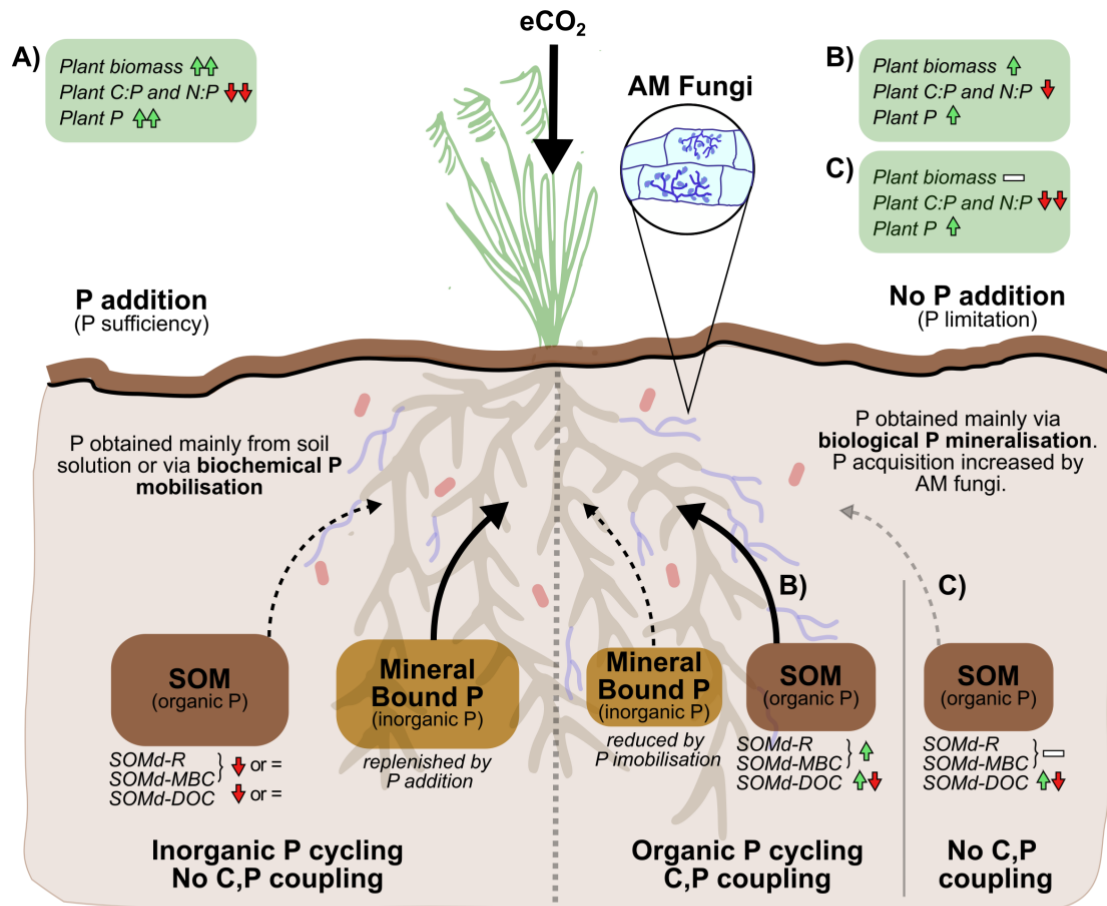

**A)** The eCO<sub>2</sub> fertilisation effect occurs **without increases in SOM decomposition**. Increased P availability is achieved via biochemical P mineralisation. The role of AM fungi is less important since plant P requirements are met and because P addition decreases AM fungi root colonisation.

**B)** The eCO<sub>2</sub> fertilisation effect occurs **contingent to increases in SOM decomposition** as a mechanism to sustain P supply to plants. However, **C)** this effect can be hampered if P is immobilised in plant and MB. High AM fungi colonisation contributes to increased plant P acquisition.

149

150

**Figure 1** Conceptual framework and expected responses of measured variables in the experiment

151

(green arrow: increase; red arrow: decrease; -: no effect). Increases in plant biomass under eCO<sub>2</sub>

152

conditions are dependent on nutrient availability. In low phosphorus (P) soils, **A)** P addition (left side)

153

will support an increase in plant biomass with eCO<sub>2</sub> (fertilisation effect) without major impacts in soil

154

organic matter-derived (SOMd) C pools: R, respired CO<sub>2</sub>; MB, microbial biomass; DOC, dissolved

155

organic C. Without P addition (right side), **B)** P acquisition may be more reliant on organic P cycling

156

(coupled C and P cycles) with enhancements in plant biomass with eCO<sub>2</sub> only observed if SOM

157

decomposition and biological P mineralisation increase. Immobilisation of P by plants, AM fungi and

158

microbial biomass becomes relevant in this scenario further increasing SOM decomposition **C)** If P

159

availability is too low, becoming limiting, increased P immobilisation and higher P competition will

160

decrease the impact on SOM decomposition and plant biomass.

161

162

## 2. Materials and methods

163

We set up a factorial experiment with three factors: **phosphorus (P) treatment:** P

164

addition (+P)/control; **AM fungi:** Active AM inoculum (AM)/Non-mycorrhizal (Sterile AM



165 inoculum, NM) and **CO<sub>2</sub>**: ambient (400 ppm - aCO<sub>2</sub>) and elevated (640 ppm - eCO<sub>2</sub>) for a  
166 total of 8 treatment combinations with 4 replicates each (+P/AM/aCO<sub>2</sub>; +P/AM/eCO<sub>2</sub>;  
167 +P/NM/aCO<sub>2</sub>; +P/NM/eCO<sub>2</sub>; control/AM/aCO<sub>2</sub>; control /AM/eCO<sub>2</sub>; control /NM/aCO<sub>2</sub>;  
168 control /NM/eCO<sub>2</sub>; n=32, **Figure SI 1A**). Plants of *Microlaena stipoides* (Labill.) R.Br., a  
169 native Australian C<sub>3</sub> grass with a broad P range, were grown from seed in 125mm pots  
170 containing around 500 g of dry soil. Plants were grown in growth chambers for twelve weeks  
171 and soil water content was kept between 15 and 20 % gravimetric content by addition of  
172 MilliQ water as needed every 2-3 days.

### 173 **2.1. Soil characteristics and treatment preparation**

174 Soil was collected from a Cumberland plain natural woodland in Western Sydney  
175 (33°37'01'' S, 150°44'26'' E, 20 m.a.s.l) near the *Eucalyptus* Free-Air CO<sub>2</sub> experiment  
176 (EucFACE). Soil at this site is an aeric podsol, slightly acidic (pH 5.38 ± 0.02 at 0-10 cm)  
177 (Ross et al., 2020), with a N content of 677 mg Kg<sup>-1</sup>, low total C (1.8%, 0-15 cm), and P  
178 content (76.28 mg Kg<sup>-1</sup>) (Hasegawa et al., 2016). Previous studies have demonstrated that  
179 both the vegetation (Crous et al., 2015) and soil fauna (Nielsen et al., 2015) are limited by P  
180 within this ecosystem. Soil was sieved (to 2 mm) and sterilised (gamma irradiated, 50 kGy)  
181 to remove viable AM fungal propagules. To reintroduce a homogenous microbial community  
182 to all pots, excluding AM fungi, we prepared a microbial inoculum. For this, approx. 3 Kg of  
183 freshly collected soil from a nearby grassland was mixed with water in a 1:3 proportion by  
184 volume and the suspension passed through a 20 µm mesh sieve to remove AM fungal spores  
185 (Brundett and Australian Centre for International Agricultural Research, 1995). Prior to  
186 potting, the filtrate was added to the sterile soil at a rate of 50 mL filtrate per Kg soil. The soil  
187 was incubated for a week at room temperature, mixing it daily.

188 The soil was then divided into four subsets based on whether they were to receive  
189 additional P and AM fungal inoculum. For the former, triple super phosphate (Richgro, super

190 phosphate fertiliser supplement 9.1% P w/w) was added in a rate of 0.4 g/kg dry soil. The  
191 triple super phosphate powder was weighed, diluted and sprayed into the soil while low P  
192 treatments received MilliQ water only. The soil was then thoroughly mixed and left to settle  
193 for a day. Next, AM fungi treatments were created by applying AM fungal inoculum in a  
194 1:10 AM fungi inoculum:soil with non-mycorrhizal controls produced by autoclaving the live  
195 AM inoculum (121 °C, two hours) and applying it to the soil in the same manner (**See**  
196 **supplementary information for AM inoculum production**). Once the four types of soils  
197 were prepared, soil was added to pots and five surface sterilised *M. stipoides* seeds (30 %  
198 H<sub>2</sub>O<sub>2</sub> for 10 minutes followed washing) were sown per pot. Pots were randomly split and  
199 placed in aCO<sub>2</sub> and eCO<sub>2</sub> chambers. After two weeks of growth, pots were thinned to one  
200 plant per pot. Unplanted pots (n=16) with the different P and CO<sub>2</sub> treatments (+P/NM/aCO<sub>2</sub>;  
201 +P/NM/eCO<sub>2</sub>; control/NM/aCO<sub>2</sub>; control/NM/eCO<sub>2</sub> n=4 each), were included to estimate  
202 effects on SOM decomposition in the absence of plants and AM fungi (**Figure SI 1A**).  
203 Unplanted pots were all prepared using soil with sterile AM inoculum and were kept under  
204 the same conditions as the planted pots for the duration of the experiment.

## 205 **2.2. Growth Chambers set up**

206 The growth chambers (six in total, three per CO<sub>2</sub> treatment) were modified using the  
207 approach of Cheng and Dijkstra (2007) to achieve a continuous <sup>13</sup>C- labelling of plant tissues  
208 in both aCO<sub>2</sub> and eCO<sub>2</sub> treatments. The chambers were adapted to take an influx of naturally  
209 <sup>13</sup>C-depleted CO<sub>2</sub> ( $\delta^{13}\text{C} = -31.7 \text{‰} \pm 1.2$ ) delivered during the photoperiod, combined with a  
210 scrubbing system made of a soda lime-filled PVC tube (72 L) that allowed continuous supply  
211 of CO<sub>2</sub>-free air (**Figure SI 1B**). Chambers were adjusted to a 16h/8h photoperiod with 25  
212 °C/18 °C, 60 % relative humidity, and light intensity of 900  $\mu\text{mol}/\text{m}^2\text{s}^{-1}$ . The chamber  
213 atmosphere was sampled frequently to confirm depletion in <sup>13</sup>C. Air samples from the  
214 chambers were extracted via a pump system into a tedlar bag (Tedlar® SCV Gas Sampling

215 Bag) and analysed for  $\delta^{13}\text{C}$  in a PICARRO G2201i isotopic  $\text{CO}_2/\text{CH}_4$  analyser (Picarro Inc.,  
216 Santa Clara, CA, USA). To avoid plant-uptake of  $^{13}\text{C}$  from outside the chambers, watering  
217 and all other manipulations were performed during the night period aided by green light.

### 218 **2.3. Harvest and sample processing**

#### 219 **Gas sampling of the plant-soil system**

220 After twelve weeks of growth, we quantified rates of total respired  $\text{CO}_2$  (R) and its C  
221 isotopic composition as described by Carrillo et al., (2015, 2014). Briefly, pots were placed  
222 on an elevated platform inside a water filled tray and covered with a PVC chamber (45 cm H  
223 x 15 cm D) adapted with an air-tight rubber stopper for air sampling. Free- $\text{CO}_2$  air was  
224 circulated for 2 hours using an aquarium pump connected to a  $\text{CO}_2$  scrubber (50 cm H x 4 cm  
225 D PVC tubing filled with soda lime). After 2 hours of scrubbing, an air sample was taken to  
226 determine baseline  $\text{CO}_2$  concentrations using a 7890A gas chromatograph with a G1888  
227 network headspace sampler (Agilent Technologies, USA). Later, the  $\text{CO}_2$  scrubbers were  
228 removed and the pump reconnected to the PVC chamber to allow for air circulation while  
229 pots were incubated. After two to three hours of incubation, a gas sample was collected in an  
230 airtight gas collection bag (Tedlar® PVDF, 1L) using an aquarium pump system and  
231 analysed for its C isotopic composition.

#### 232 **Plant and soil harvest**

233 One day after gas sampling, pots were destructively harvested. Aboveground biomass  
234 was cut and roots separated from the soil and washed. Plant aboveground biomass, roots and  
235 a subsample of fresh soil were oven dried at 60 °C for measurements of dry plant biomass,  
236 soil gravimetric water content and total nutrients. A fresh soil subsample was stored at -20 °C  
237 for microbial community analyses and the remaining fresh soil was used for assessments of  
238 dissolved nutrients and microbial biomass.

#### 239 **Plant, soil nutrients and microbial biomass C and N**

240 Two sub-samples of soil were weighed. Dissolved nutrients in soil were extracted  
241 from the first subsample with a 0.05M K<sub>2</sub>SO<sub>4</sub> solution in a 4:1 solution to soil ratio, shaking  
242 at 180 rpm for an hour. Samples were filtered through a Whatman # 42 filter paper and  
243 frozen (-20°C) until analyses. The second subsample was fumigated for 5 days with  
244 chloroform and then nutrients were extracted as for unfumigated samples. The fumigated and  
245 unfumigated extracts were analysed for total dissolved organic C and N (Shimadzu® TN,  
246 TOC-L, Japan) and microbial biomass C and N calculated by subtracting fumigated and  
247 unfumigated samples (Vance et al., 1987). The volume left of these K<sub>2</sub>SO<sub>4</sub> extractions was  
248 used to obtain the isotopic composition of DOC and microbial biomass (see section below).  
249 Phosphates were extracted following the Bray 1-P method for acidic soils, in a 1:7  
250 solution:soil ratio using a 0.03M NH<sub>4</sub>F solution in 0.025 M hydrochloride (HCl) adjusted pH  
251 to 2.6 ± 0.05 with HCl (Rayment et al., 2010). Samples were manually shaken for 60s and  
252 immediately poured over a Whatman # 42 filter paper. Collected extracts were analysed by  
253 colorimetry (AQ2 Discrete Analyser, SEAL Analytical, Mequon, WI, USA).

254 Total P and N were determined from ground oven-dried soil and root samples. Total P  
255 concentration was analysed by an X-ray fluorescence spectrometer (PANalytical, epsilon 3.  
256 10Kv, 0.9mA. Lelyweg, Almelo, Netherlands) while total C and N from soil, roots and soil  
257 extracts were analysed along their isotopic composition.

#### 258 **2.4. Respired, dissolved organic C (DOC) and microbial biomass isotopic** 259 **composition and partitioning**

260 Gas samples from plant-soil system incubations were analysed in a PICARRO analyser  
261 (G2201i; Picarro, Santa Clara, CA, USA. Precision values below 0.16‰) for the δ<sup>13</sup>C and  
262 CO<sub>2</sub> concentration of the total respired CO<sub>2</sub> (R). For the isotopic composition of the DOC and  
263 microbial biomass C (MBC), fumigated (*f*) and unfumigated (*uf*) soil K<sub>2</sub>SO<sub>4</sub> extracts were  
264 oven dried at 60°C. The dried extracts were scraped and weighed for analysis on a Thermo

265 GC-C-IRMS system (Trace GC Ultra gas chromatograph, Thermo Electron Corp., Milan,  
266 Italy; coupled to a Delta V Advantage isotope ratio mass spectrometer through a GC/C-III);  
267 University of California, Davis Campus, USA). The  $\delta^{13}\text{C}$  of unfumigated soil extracts was  
268 used as the isotopic composition of the DOC while  $\delta^{13}\text{C}$  of MBC ( $\delta^{13}\text{C}_{\text{MBC}}$ ) were calculated  
269 from  $\delta^{13}\text{C}$  values of both fumigated (*f*) and unfumigated (*uf*) extractions (**See supplementary**  
270 **information for calculations of the isotopic composition of the microbial biomass**).  
271 Samples of dried soil were also analysed on the Thermo GC-C-IRMS system for C, N and  
272  $\delta^{13}\text{C}$ .

273 To calculate the fractions of SOM-derived C in the total respired  $\text{CO}_2$  (R), dissolved  
274 organic C (DOC) and microbial biomass C (MBC) we used isotopic partitioning as:  
275  $\text{SOM.C}_{R,DOC,MBC} = (\delta^{13}\text{C}_{R,DOC,MBC} - \delta^{13}\text{C}_p) / (\delta^{13}\text{C}_{\text{control}} - \delta^{13}\text{C}_p)$ . Where  $\delta^{13}\text{C}_{R,DOC,MBC}$  were the  
276  $\delta^{13}\text{C}$  of either the  $\text{CO}_2$  measured in the total respired  $\text{CO}_2$  (R), dissolved organic C (DOC) or  
277 microbial biomass C (MBC)) from each pot;  $\delta^{13}\text{C}_p$  is the isotopic ratio of the plant source  
278 averaged across P treatments per  $\text{CO}_2$  condition (root biomass at  $\text{aCO}_2$   $\delta^{13}\text{C} = -40.01 \pm 0.08$   
279 and  $\text{eCO}_2$   $\delta^{13}\text{C} = -43.20 \pm 0.04$ ) and  $\delta^{13}\text{C}_{\text{control}}$  is the average  $\delta^{13}\text{C}$  of the native SOM source  
280 obtained from the dried bulk soil across  $\text{CO}_2$  and P conditions ( $\delta^{13}\text{C} = -25.31 \pm 0.02$ ). The  
281 fractions of plant-derived C were obtained by subtracting SOM-derived fractions from the  
282 unit. Measured total respired  $\text{CO}_2$  rates, DOC and MBC were partitioned into SOM-derived  
283 and plant-derived, using these fractions to obtain the mass of the SOM derived R, MBC and  
284 DOC pools. In this study, we focus only on the SOM-derived C pools and fractions.

## 285 **2.5. Microbial community analysis: Phospholipid-derived fatty acids (PLFA) and** 286 **Neutral lipid-derived fatty acids (NLFA)**

287 Soil PLFAs were extracted to assess the overall microbial communities while the  
288 16:1 $\omega$ 5c NLFA was used as an indicator of arbuscular mycorrhizal (AM) fungi presence and

289 abundance (Olsson, 1999). Freeze-dried soil from planted pots (n=32) were extracted  
290 following the protocol by Buyer & Sasser (2012) with modifications by Castañeda-Gómez et  
291 al. (2020) (**See supplementary information for PLFA and NLFA analyses**). Functional  
292 groups were defined as shown in **Table SI 1**. Fungal to bacterial ratio (F:B) was calculated  
293 by dividing fungal PLFAs (not including AM fungi) by the sum of bacterial PLFAs. The sum  
294 of individual lipids was used as an indicator of the size of the community ( $\mu\text{g PLFA g}^{-1}$  dry  
295 soil).

## 296 **2.6. Statistical analyses**

297 The effect of CO<sub>2</sub> condition, AM fungi treatment and P addition and their interactions on  
298 the response variables was analysed with a linear model fitted with the function “lm” from  
299 the stats package in R version 3.3.2 (R Core Team 2016). This approach was used instead of  
300 a mixed effects modelling approach since pots were moved among chambers with the same  
301 CO<sub>2</sub> treatment so it was not possible to estimate a random effect associated with each  
302 chamber. The normality of the residuals of each model was inspected to check the  
303 appropriateness of the fit and transformations were performed when needed. Statistical  
304 significance was determined performing an ANOVA (Analyses of variance) with the  
305 “Anova” function (“car” package, Fox et al. 2017). Multiple mean comparisons were  
306 performed using the Tukey test using the “glht” function (“multcomp” package, Hothorn et  
307 al. 2017). As soil moisture can affect soil respiration measurements, we tested for  
308 correlations between soil moisture and the total respired CO<sub>2</sub>, SOMd- respired CO<sub>2</sub> fraction  
309 and total mass of SOMd- respired CO<sub>2</sub>. For response variables with a significant correlation  
310 with moisture, a 3-way ANCOVA was performed with soil moisture as covariate, to account  
311 for the variability brought by the slightly different moisture contents at the time of CO<sub>2</sub>  
312 sampling. The homogeneity of the regression slopes, normality of residuals and homogeneity

313 of variances was tested when performing the ANCOVA. Significance levels were:  $\leq 0.1$ (.),  $\leq$   
314  $0.05$ (\*),  $\leq 0.01$  (\*\*),  $\leq 0.001$ (\*\*\*).

315 Microbial communities were analysed as the PLFA-based total microbial biomass (sum  
316 of all individual lipids, in  $\mu\text{g PLFA g}^{-1}$  dry soil), as absolute microbial abundance (reflecting  
317 the size or biomass of the community, in  $\mu\text{g PLFA g}^{-1}$  dry soil) and as relative abundance (in  
318 percentage, reflecting microbial community composition) of the different microbial groups  
319 and as individual lipids. To visualise significant three-way interactions of experimental  
320 factors in the abundance of microbial groups from the ANOVA, the “emmip” function from  
321 the “emmeans” package (Lenth et al., 2020) was used to show the estimated marginal means  
322 from the fitted linear model.

### 323 **3. Results**

#### 324 ***3.1. Influence of elevated CO<sub>2</sub>, P availability and AM fungi on SOM decomposition*** 325 ***and C pools***

326 Higher SOM-C losses under eCO<sub>2</sub> were expected for control P conditions (low P) and  
327 particularly when AM fungi were inoculated (**Figure 1**). However, we found that in general,  
328 there was not a significant interactive impact of the three experimental factors on the respired  
329 CO<sub>2</sub>, microbial biomass C (MBC) and dissolved organic C (DOC) as initially expected.  
330 Instead, we found that the interaction of AM and P treatments was relevant determining the  
331 fate of these soil C pools, regardless of eCO<sub>2</sub>. AM and P treatments significantly affected the  
332 total respired CO<sub>2</sub> (**Figure 2**), which decreased with P addition but only for the NM treatment  
333 ( $P < 0.05$ , Tukey’s multiple comparison). However, we did not find any significant effects of  
334 CO<sub>2</sub> conditions, AM or P treatments on the SOM-derived respired CO<sub>2</sub> (**Figure 2**). On the  
335 other hand, most of the microbial biomass C (MBC) was derived from SOM (above 80%,  
336 **Table SI 2**) and while neither the total microbial biomass C nor the SOM-derived MBC  
337 (**Figure 2**) were affected by the experimental factors, the C sources used by the microbial



338 biomass were affected by the interaction between AM and P treatment (**Table SI 2**). The  
339 fraction of MBC derived from SOM marginally increased by 6% with P addition in NM  
340 treatments ( $P=0.1$ , Tukey's multiple comparison. **Table SI 2**). Similar to the MBC pool, most  
341 of the DOC was derived from SOM (above 80%, **Table SI 2**) and both the total DOC and  
342 SOM-derived DOC were affected by the interaction between AM and P treatments (**Figure**  
343 **2**) with P addition significantly increasing the SOM-derived DOC in NM treatment ( $P=0.001$ ,  
344 Tukey's multiple comparison). Finally, although not evidenced in the total DOC or SOM-  
345 derived DOC, the fraction of DOM-derived DOC significantly increased with  $eCO_2$  (**Table**  
346 **SI 2**).

347

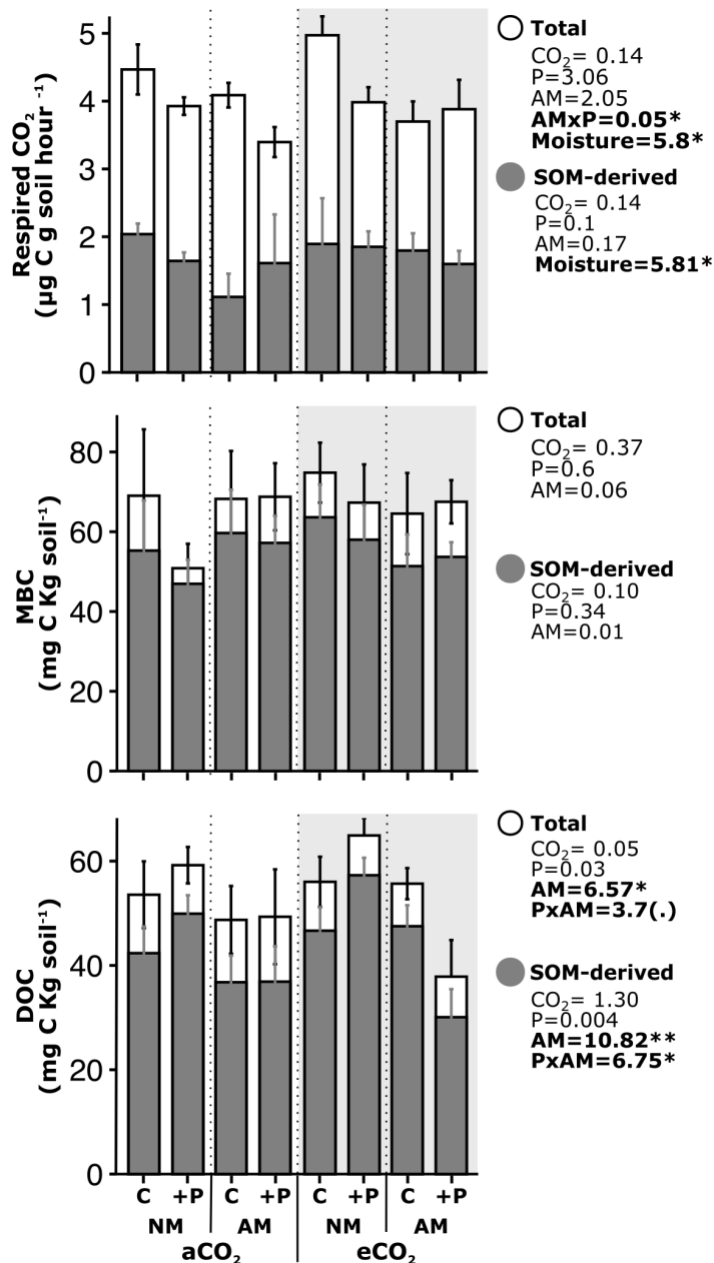

**Figure 2.** Mean values ( $\pm$  standard error,  $n=4$ ) of the total (white) and SOM-derived (grey) respired CO<sub>2</sub>, microbial biomass C (MBC) and dissolved organic C (DOC) per CO<sub>2</sub> condition, AM fungi and P addition treatment (C: control and +P: P addition). CO<sub>2</sub> conditions are shown on light grey (elevated) and white (ambient) backgrounds.  $F_{(1,24)}$  values of ANCOVAs (for respired CO<sub>2</sub>) and ANOVAs from linear model for response variables displayed on the right. Significance levels:  $\leq 0.1$ (.),  $\leq 0.05$ (\*),  $\leq 0.01$ (\*\*),  $\leq 0.001$ (\*\*\*). Only significant interactions of the treatments displayed.

381

382

### 3.2. Soil nutrient responses to elevated CO<sub>2</sub>, P availability and AM fungi

383

We expected eCO<sub>2</sub> to increase C and nutrient availability, P addition to increase soil P,

384

and AM fungi to decrease soil P and N due to higher nutrient acquisition and immobilisation

385

by the fungal biomass. These expectations were partially supported with our observations.

386

eCO<sub>2</sub> increased total soil N, but only for control P pots while dissolved N marginally

387

decreased with eCO<sub>2</sub> for AM pots (**Table 1**). Total soil P was unaffected by eCO<sub>2</sub> conditions

388

while soil dissolved P significantly decreased with eCO<sub>2</sub> conditions, particularly for control P

389 and AM pots (**Table 1**). P addition increased total soil P while AM decreased total P and  
 390 dissolved N (**Table 1**). Finally, we detected lower dissolved C:N with P addition for AM pots  
 391 but higher dissolved C:N for AM pots with eCO<sub>2</sub> (**Figure 3**). Dissolved C:P decreased with P  
 392 addition for pots under eCO<sub>2</sub> conditions while it increased with eCO<sub>2</sub> for AM pots (**Figure 3**).  
 393 **Table 1** Soil nutrients (total and dissolved (ppm)) per CO<sub>2</sub> condition, AM fungi and P addition  
 394 treatment. Dissolved nutrients as: DOC – total dissolved organic Carbon, TN – total nitrogen and  
 395 phosphates (PO<sub>4</sub>). Mean values (± standard error, n=4) followed by the same letter are not significantly  
 396 different (p≤ 0.05, Tukey multiple comparison test), no letters indicate non-significant effect of the  
 397 treatments. AM: Arbuscular mycorrhizal and NM: non-mycorrhizal. Below, ANOVA results from  
 398 linear model (lm) for response variables (× natural log transformed). F<sub>(1,24)</sub> values displayed with  
 399 significance levels: ≤ 0.1(.), ≤ 0.05(\*), ≤ 0.01 (\*\*), ≤ 0.001(\*\*\*)  
 400

|                  |    |                      | Total         |                 | Dissolved    |                   |
|------------------|----|----------------------|---------------|-----------------|--------------|-------------------|
|                  |    |                      | Soil N        | Soil P          | TN×          | PO <sub>4</sub> × |
|                  |    | control              | 347.2(9.5)a   | 166(20)a        | 4.2(0.4)     | 2.49(0.8)ab       |
|                  | NM | +P                   | 558.2(39.7)ab | 268(10)b        | 4.2(0.5)     | 1.25(0.1)ab       |
|                  |    | control              | 472.9(23.5)a  | 167(12)a        | 3.6(0.6)     | 3.86(0.3)b        |
| aCO <sub>2</sub> | AM | +P                   | 526.1(60.7)ab | 207(32)a        | 4.8(1.0)     | 2.75(0.6)ab       |
|                  |    | control              | 665.0(116.4)b | 155(26)a        | 4.4(0.1)     | 1.08(0.1)a        |
|                  | NM | +P                   | 425.1(63.0)ab | 238(21)b        | 4.5(0.5)     | 3.40(0.8)ab       |
|                  |    | control              | 633.7(103.9)b | 132(10)a        | 3.7(0.2)     | 1.09(0.1)a        |
| eCO <sub>2</sub> | AM | +P                   | 643.0(70.3)ab | 195(11)a        | 3.0(0.8)     | 1.00(0.1)a        |
|                  |    | CO <sub>2</sub>      | <b>5.46*</b>  | 2.52            | 1.74         | <b>8.84**</b>     |
|                  |    | P                    | 0.03          | <b>28.01***</b> | 0.16         | 0.0001            |
|                  |    | AM                   | 2.00          | <b>5.41*</b>    | <b>6.58*</b> | 0.08              |
|                  |    | CO <sub>2</sub> xP   | <b>6.25*</b>  | 0.003           | 0.60         | <b>7.64*</b>      |
|                  |    | CO <sub>2</sub> xAM  | 0.22          | 0.02            | 3.64(.)      | <b>11.45**</b>    |
|                  |    | AMxP                 | 0.21          | 2.30            | 0.15         | 3.46              |
|                  |    | PxAMxCO <sub>2</sub> | 4.23(.)       | 0.56            | 1.22         | 2.90              |

401

### 402 **3.3. Plant responses to elevated CO<sub>2</sub>, P availability and AM fungi**

403 We expected that plant biomass would increase with eCO<sub>2</sub> when P availability was high,  
 404 and be unresponsive to eCO<sub>2</sub> when P availability was low unless AM fungi were present,  
 405 supporting further plant growth by increasing SOM decomposition and P uptake (**Figure 1**).  
 406 We did not observe a significant impact of eCO<sub>2</sub> on aboveground plant biomass regardless of  
 407 the P and AM treatments. However, eCO<sub>2</sub> effects increased root biomass when AM fungi  
 408 were present, regardless of the P treatment (**Table 2**). Increases in plant biomass with P  
 409 addition were not observed either, but we expected to see increases in plant P concentrations  
 410 in response to P addition and decreases in plant C-to-nutrient ratios with eCO<sub>2</sub> as an

411 indication of nutrient resorption and higher nutrient immobilisation, which would be  
 412 particularly important in low P conditions. Supporting our predictions, we observed  
 413 increases in plant P concentration as well as the plant P pool in both shoot and roots with P  
 414 addition (**Table 2**). As a consequence, plant C:P and N:P significantly decreased with P  
 415 addition (**Figure 3**). However, C-to-nutrient ratios in plant tissues were not strongly affected  
 416 by eCO<sub>2</sub> and no clear evidence for increased P immobilisation under eCO<sub>2</sub> was found. On the  
 417 other hand, plant N increased with AM presence but only under eCO<sub>2</sub> (**Table 2**). Finally,  
 418 higher plant C:N was observed with eCO<sub>2</sub>, whereas plant C:N increased with P addition for  
 419 NM pots (**Figure 3**).

420

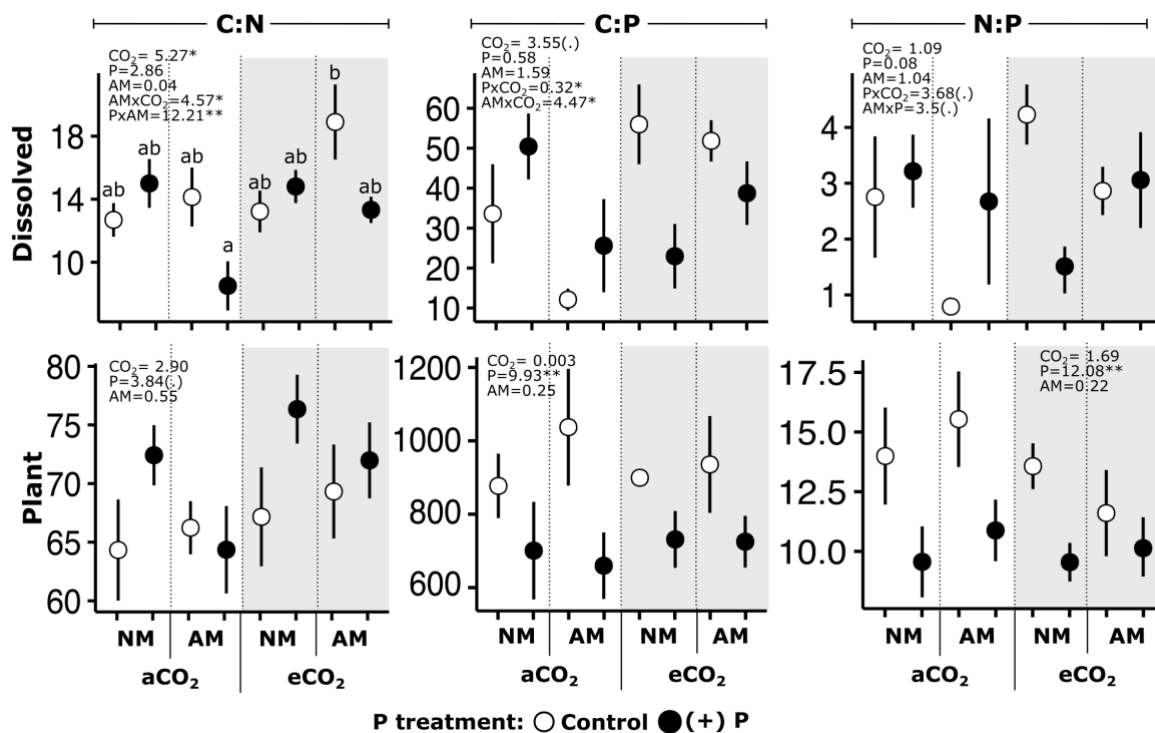

421

422 **Figure 3.** Mean values ( $\pm$  standard error, n=4) of mass nutrient ratios (columns) in plant and soil  
 423 solution (dissolved) per treatment. eCO<sub>2</sub> conditions shown as grey areas and P treatment as  
 424 white(control) or black (+P) circles. NM (non-mycorrhizal).  $F_{(1,24)}$  values of ANOVAs from linear  
 425 model for response variables displayed. Significance levels:  $\leq 0.1$ (.),  $\leq 0.05$ (\*),  $\leq 0.01$ (\*\*),  $\leq$   
 426  $0.001$ (\*\*\*); only significant interactions of the treatments displayed. Treatments with different letters  
 427 are significantly different ( $p \leq 0.05$ , Tukey multiple comparison test).

428

429

430

431 **Table 2** Plant biomass (shoot and roots), nutrient contents and plant P and N pools (plant P and N  
 432 content per unit of shoot and root biomass) per CO<sub>2</sub> condition, AM fungi and P addition treatment.  
 433 NM (non-mycorrhizal). Mean values ( $\pm$  standard error, n=4) followed by the same letter are not  
 434 significantly different ( $p \leq 0.05$ , Tukey multiple comparison test), no letters indicate non-significant  
 435 effect of the treatments. Below, results of the ANOVA from linear model (lm) for response variables  
 436 ( $\times$  log transformed).  $F_{(1,24)}$  values displayed with significance levels:  $\leq 0.1$ (.),  $\leq 0.05$ (\*),  $\leq 0.01$  (\*\*),  $\leq$   
 437 0.001(\*\*\*).

|                  |    | Biomass              |              | Nutrient Concentration |                  |              |               |
|------------------|----|----------------------|--------------|------------------------|------------------|--------------|---------------|
|                  |    | Shoot                | Root         | Plant C                | Plant N $\times$ | Plant P      |               |
|                  |    | g                    |              | g/Kg                   |                  |              |               |
| aCO <sub>2</sub> | NM | control              | 2.7(0.2)     | 2.1(0.08)ab            | 356.9(30.2)      | 5.5(0.2)     | 0.45(0.07) a  |
|                  |    | +P                   | 2.8(0.3)     | 2.0(0.3)ab             | 380.6(14.6)      | 5.3(0.1)     | 0.59(0.09) b  |
| aCO <sub>2</sub> | AM | control              | 2.8(0.1)     | 1.7(0.3)a              | 395.0(11.5)      | 6.0(0.4)     | 0.41(0.07) a  |
|                  |    | +P                   | 4.3(1.2)     | 1.8(0.3)a              | 400.8(6.4)       | 6.2(0.4)     | 0.64(0.08) b  |
| eCO <sub>2</sub> | NM | control              | 3.2(0.5)     | 1.7(0.2)ab             | 391.6(8.9)       | 5.9(0.3)     | 0.44(0.01) a  |
|                  |    | +P                   | 3.2(0.4)     | 2.1(0.2)ab             | 390.1(8.5)       | 5.1(0.2)     | 0.55(0.06) b  |
| eCO <sub>2</sub> | AM | control              | 3.4(0.3)     | 2.4(0.4)b              | 376.1(16.1)      | 5.5(0.2)     | 0.44(0.09) a  |
|                  |    | +P                   | 3.6(0.3)     | 2.4(0.3)b              | 382.7(14.8)      | 5.3(0.2)     | 0.55(0.09) b  |
|                  |    | CO <sub>2</sub>      | 0.3516       | 2.1                    | 0.03             | 2.48         | 0.19          |
|                  |    | P                    | 1.0574       | 0.2835                 | 0.65             | 2.52         | <b>8.87**</b> |
|                  |    | AM                   | 2.1422       | 0.1943                 | 0.61             | 2.35         | 0.03          |
|                  |    | CO <sub>2</sub> xP   | 0.9543       | 0.4923                 | 0.29             | 1.13         | 0.54          |
|                  |    | CO <sub>2</sub> xAM  | 0.4513       | <b>5.1081*</b>         | <b>3.49(.)</b>   | <b>5.22*</b> | 0.03          |
|                  |    | AMxP                 | 1.241        | 0.4535                 | 0.06             | 2.81         | 0.08          |
|                  |    | PxAMxCO <sub>2</sub> | 0.758        | 1.0528                 | 0.33             | 0.04         | 0.08          |
|                  |    | P pool               |              | N pool                 |                  |              |               |
|                  |    | Shoot P              | Root P       | Shoot N $\times$       | Root N           |              |               |
|                  |    | mg                   |              |                        |                  |              |               |
| aCO <sub>2</sub> | NM | control              | 1.2(0.2) a   | 0.89(0.14) a           | 15.14(0.87)      | 11.64(0.65)  |               |
|                  |    | +P                   | 1.6(0.2) b   | 1.25(0.35) b           | 14.46(1.48)      | 10.52(1.34)  |               |
| aCO <sub>2</sub> | AM | control              | 1.2(0.2) a   | 0.66(0.04) a           | 16.75(1.13)      | 10.09(0.99)  |               |
|                  |    | +P                   | 3.0(1.1) b   | 1.06(0.06) b           | 19.38(2.22)      | 13.84(2.15)  |               |
| eCO <sub>2</sub> | NM | control              | 1.4(0.2) a   | 0.72(0.06) a           | 19.29(3.75)      | 9.85(1.44)   |               |
|                  |    | +P                   | 1.8(0.3) b   | 1.23(0.22) b           | 16.59(3.05)      | 11.25(1.37)  |               |
| eCO <sub>2</sub> | AM | control              | 1.5(0.3) a   | 0.99(0.10) a           | 18.97(2.59)      | 13.27(2.04)  |               |
|                  |    | +P                   | 2.0(0.3) b   | 1.22(0.03) b           | 18.89(1.23)      | 12.46(1.68)  |               |
|                  |    | CO <sub>2</sub>      | 0.03         | 0.40                   | 1.65             | 0.03         |               |
|                  |    | P                    | <b>5.62*</b> | <b>10.98**</b>         | 0.08             | 0.55         |               |
|                  |    | AM                   | 1.50         | 0.11                   | 2.60             | 2.19         |               |
|                  |    | CO <sub>2</sub> xP   | 1.08         | 0.002                  | 0.32             | 0.22         |               |
|                  |    | CO <sub>2</sub> xAM  | 0.67         | 2.25                   | 0.35             | 0.43         |               |
|                  |    | AMxP                 | 1.24         | 0.28                   | 1.10             | 0.38         |               |
|                  |    | PxAMxCO <sub>2</sub> | 0.91         | 0.49                   | 0.01             | 2.67         |               |

438

### 439 3.4. Microbial communities including AM

440 AM fungi presence and abundance was assessed with the 16:1 $\omega$ 5c neutral lipid, which  
 441 was high in AM-inoculated pots lacking additional P. However, P addition reduced the  
 442 concentration of the AM fungal lipid in soil to a level approaching the uninoculated pots  
 443 (AMxP:  $F_{(1,24)} = 6.28$ ,  $P < 0.001$  **Table SI 2**). We assessed the biomass and composition of

444 the microbial community as we expected that AM fungi would alter soil saprotrophic  
 445 communities as a mechanisms to enhance SOM decomposition under low P conditions. We  
 446 observed a significant increase in microbial biomass with AM fungi in low P (control pots)  
 447 and eCO<sub>2</sub> conditions. The increase in microbial biomass in these conditions was particularly  
 448 due to the response of Gram positive bacteria and Actinobacteria (**Figure 4**). Gram negative  
 449 bacteria and fungi significantly increased with eCO<sub>2</sub> while protozoa increased with eCO<sub>2</sub> only  
 450 for NM pots (**Figure SI 2**).

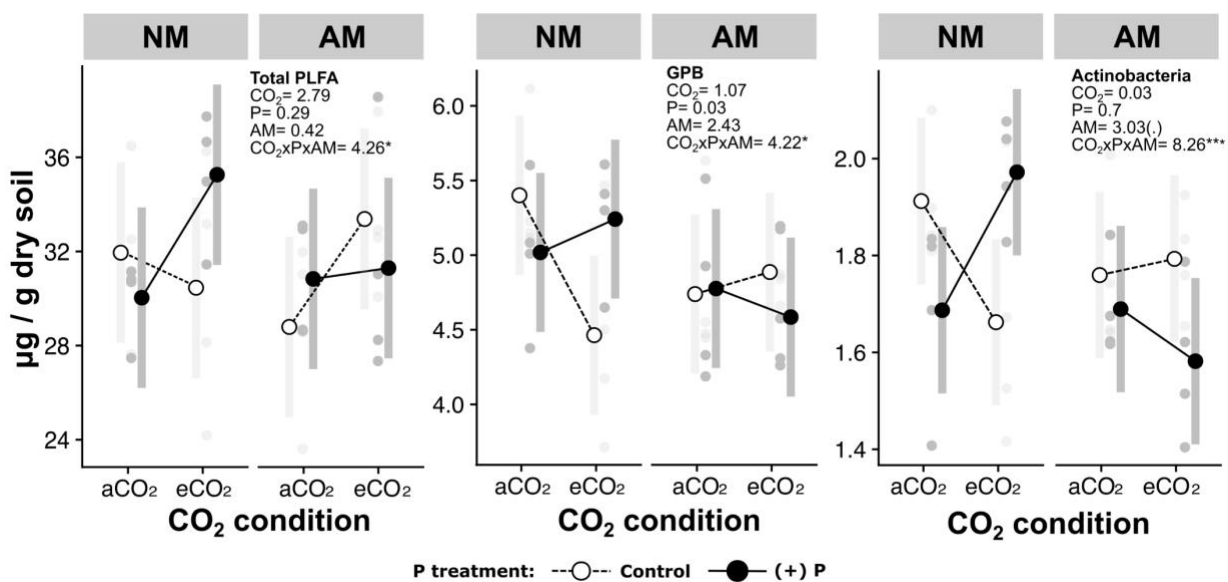

451 **Figure 4.** Estimated marginal means with original data (grey circles) and confidence intervals  
 452 (grey bars) of the total microbial biomass, GPB (Gram positive bacteria) and actinobacteria  
 453 (µg/g dry soil) from fitted lineal models per experimental treatments. P treatment as white  
 454 circles and dashed lines (control) or black circles and solid lines (+P) for estimated means,  
 455 and as light grey (control) and dark grey (+P) for original data. NM: non-mycorrhizal.  
 456 ANOVA results displayed with significance levels: ≤ 0.1(.), ≤ 0.05(\*), ≤ 0.01 (\*\*), ≤  
 457 0.001(\*\*\*); only significant interactions of the treatments displayed. Grey circles are the  
 458 original data input for the models.

459

#### 460 4. Discussion

461 Our experiment investigated whether, under low P conditions, increased SOM  
 462 decomposition and organic P cycling would allow for a sustained plant fertilisation effect  
 463 with eCO<sub>2</sub>. We expected to observe increases in plant biomass under eCO<sub>2</sub> conditions and  
 464 low P availability paired with higher SOM derived C pools (SOM derived respired CO<sub>2</sub>,

465 MBC, DOC), with further enhancements of SOM decomposition when AM fungi were  
466 inoculated due to the role of this symbiotic fungi on P acquisition. We did not find strong  
467 evidence suggesting that increases in soil C cycling with low P availability supported plant  
468 growth under eCO<sub>2</sub>. Instead, we found that the impacts of CO<sub>2</sub> enrichment and P availability  
469 on plant growth and soil C cycling were generally independent of each other with increases in  
470 root biomass and soil C cycling under eCO<sub>2</sub> occurring regardless of the P treatment. Contrary  
471 to our hypotheses (**Figure 1**), soil C cycling was enhanced with P addition, suggesting that  
472 low P conditions were limiting soil C cycling. On the other hand, root biomass increased with  
473 eCO<sub>2</sub> conditions and AM presence, while microbial biomass increased with eCO<sub>2</sub> in AM-  
474 inoculated pots and control P conditions mainly due to the response of Gram positive bacteria  
475 and Actinobacteria. Taken together, our findings in this plant-soil system demonstrate that C  
476 and P biogeochemical cycles may not become coupled to sustain an eCO<sub>2</sub> fertilisation effect  
477 but instead, that low soil P will limit C cycling responses to eCO<sub>2</sub> with AM potentially  
478 outcompeting saprotrophic communities for nutrients and hampering SOM decomposition.

479 The CO<sub>2</sub> fertilization effect is modulated by the interaction of mycorrhizal associations  
480 and nutrient availability (Terrer et al., 2019, 2016; Treseder, 2004). In this study, although  
481 the increases in root biomass under eCO<sub>2</sub> conditions occurred when AM fungi were present,  
482 this effect occurred regardless of P availability. The CO<sub>2</sub> fertilization effect is a product of  
483 higher plant photosynthetic activity leading to excess C in plant tissues leading to increased  
484 growth. In this study, we observed a marginally higher plant C:N ratio with eCO<sub>2</sub> (**Figure 3**)  
485 but no significant increases in plant biomass. The observed additional assimilated C was  
486 potentially allocated belowground, driving the detected increases in root biomass and AM  
487 fungi growth and activity (Cheng and Johnson, 1998; Mohan et al., 2014; Treseder, 2004).  
488 The presence of AM fungi has been previously reported to increase root biomass with eCO<sub>2</sub>  
489 (Baslam et al., 2012; Dong et al., 2018; Zhu et al., 2016) and root biomass responses to eCO<sub>2</sub>



490 may not be necessarily affected by low P conditions (Jiang et al., 2020). It is hypothesised  
491 that the positive feedback of eCO<sub>2</sub> and AM fungi on plant growth is mediated by the nutrient  
492 uptake role of these symbiotic fungi (Alberton et al., 2005). While P availability has been  
493 found to drive the CO<sub>2</sub> fertilization effect on ectomycorrhizal plants, the response of  
494 arbuscular mycorrhizal plants to eCO<sub>2</sub> seems to be more dependent on soil N availability  
495 (Terrer et al., 2019). Although we did not find that P availability mediated increases in root  
496 biomass with eCO<sub>2</sub> and AM fungal presence, we observed that AM fungi marginally  
497 increased plant N contents in the aboveground biomass (**Table 2**), as well as decreased  
498 dissolved N and P in soil with eCO<sub>2</sub> (**Table 1**) and plant C:N with P addition (**Figure 3**), all  
499 of this indicating that AM fungi might have promoted N uptake when P was added and  
500 facilitated the observed increases in root biomass.

501         We hypothesised that higher SOM decomposition would occur with low P availability  
502 as organic P cycling and biological P mobilisation mechanisms are crucial when mineral P  
503 sources are depleted (Reed et al., 2011). Contrary to our expectations, we found that P  
504 addition enhanced soil C cycling. Increases in SOM decomposition with P addition in P-  
505 limited systems have been previously reported (Cleveland et al., 2006) and can be explained  
506 by the higher affinity of P to mineral surfaces and the consequent release of labile C that  
507 promotes microbial activity (Mori et al., 2018). We expected that AM fungi presence would  
508 further enhance SOM decomposition in low P conditions (**Figure 1**). Labile C funnelled via  
509 AM fungi to the saprotrophic community may enhance soil microbial community activity and  
510 promote SOM decomposition (Frey, 2019). Although we observed higher microbial biomass  
511 under eCO<sub>2</sub> and AM presence in control P conditions, we suggest that the lack of significant  
512 increases in SOM decomposition in these conditions may be due to higher competition  
513 between AM fungi and saprotrophic communities that might have limited enhanced soil C  
514 cycling (Zhou et al., 2019). The changes in plant C:N, soil dissolved C:N, total soil C:N with

515 AM fungi explained above further support the idea that AM fungi might outcompete  
516 saprotrophic microbes in N and P uptake. Finally, we detected a decrease in SOM  
517 decomposition with P addition and AM-inoculated pots (**Figure 2**), but caution must be taken  
518 when interpreting this result since P addition also significantly reduced AM fungi presence  
519 and thus, it cannot be claimed that the reduction in SOM decomposition with P addition in  
520 AM pots is due to AM fungi presence.

521 We expected that SOM decomposition and, thus, organic P cycling would increase with  
522 eCO<sub>2</sub> particularly under low P conditions as a mechanism to sustain plant nutrient demands  
523 (**Figure 1**). Our results show evidence for increased C cycling with CO<sub>2</sub> enrichment,  
524 particularly for the fraction of SOM-derived DOC, but this effect was not dependent on P  
525 availability. Increases in DOC with eCO<sub>2</sub> have been previously attributed to increases in C  
526 allocation belowground and higher rhizodeposition (Drake et al., 2011; Freeman et al., 2004;  
527 Lukac et al., 2003; Phillips et al., 2011) but it can also be due to increased SOM  
528 decomposition (Hagedorn et al., 2008, 2002). Our isotopic analyses allowed us to detect that  
529 increases in DOC under eCO<sub>2</sub> in this system were due to enhanced SOM decomposition  
530 given the observed increase in SOM-derived DOC fraction (**Table SI 2**). The DOC made  
531 available via SOM decomposition can be either incorporated in the microbial biomass or lost  
532 via leaching. We did not observed changes in the SOM-derived MBC with eCO<sub>2</sub> and thus the  
533 extra DOC was likely not incorporated in the microbial biomass but rather lost via leaching  
534 (Kindler et al., 2011). On the other hand, only marginally higher soil respiration with eCO<sub>2</sub>  
535 was found in the present study which can be due to the low diffusivity of CO<sub>2</sub> from soils,  
536 particularly with high soil moisture (Davidson et al., 2000; Hashimoto and Komatsu, 2006;  
537 Maier and Schack-Kirchner, 2014). In our experiment, volumetric soil water content was on  
538 average 23% for planted pots, which is slightly above the expected (12-21%) soil water

539 holding capacity for a soil with sandy to loamy texture as the one used for this experiment  
540 (Datta et al., 2017; Easton and Bock, 2016).

541 We observed higher P concentrations in plant tissues but this was not accompanied by  
542 increases in biomass under any CO<sub>2</sub> condition. Higher P concentration in plant tissues  
543 without increases in biomass can occur due to a P luxury consumption of plants, where  
544 higher P immobilisation is not necessarily related to increases in growth (Brar and Tolleson,  
545 1975). Lack of responses to P addition in biomass (Nie et al., 2009) and abundance  
546 (Robinson et al., 1993) for *Microlaena stipoides* have been observed before and attributed to  
547 a nutrient accumulation strategy of this grass species, the time and frequency of fertilizer  
548 additions and the low response that Australian native grasses typically have to fertilizer  
549 application. In this study, only one addition of P as triple superphosphate was done at the  
550 start of this experiment. Australian native grasses are less responsive to fertilizer addition  
551 during establishment (Nie et al., 2009), which explains the lack of biomass effects of *M.*  
552 *stipoides* in this experiment. Also, triple superphosphate is highly soluble in water and  
553 becomes rapidly available for plant uptake (Mullins et al., 1995) by the first week of  
554 application (Ghosal and Chakraborty, 2012). Hence, increases in P concentrations in plant  
555 tissues occurred at the beginning of the experiment when AM fungi had not fully colonised  
556 the roots and so, their role in soil C transformations and plant P uptake were less relevant.

557 Current understanding of the impacts of eCO<sub>2</sub> on plant productivity with low nutrient  
558 conditions have focused on N-limited ecosystems. Higher SOM decomposition under eCO<sub>2</sub>  
559 when N availability is low occurs as a mechanism to sustain nutrient supply and plant  
560 growth, with mycorrhizal fungi aiding to deliver the mined nutrients to the plants. For P-  
561 limited ecosystems however, low P availability generally constrains ecosystem responses to  
562 CO<sub>2</sub> enrichment (Ellsworth et al., 2017; Jiang et al., 2020; Reed et al., 2015; Reich et al.,  
563 2006) and the role of AM fungi mediating plant and soil C responses to eCO<sub>2</sub> with low P

564 availability is not fully clear. Thanks to the detailed measurement of soil C cycling as changes  
565 in total C pools, SOM-derived fractions and total mass of SOM-derived C pools, we show  
566 that the impacts of CO<sub>2</sub> enrichment and P availability on plant growth and soil C cycling  
567 were independent of each other and are not likely to become coupled with eCO<sub>2</sub> conditions.  
568 We also demonstrate that although AM fungi may contribute to increases in microbial  
569 biomass with eCO<sub>2</sub> and low-P conditions, this effect may not translate into enhanced SOM  
570 decomposition due to increased nutrient competition that may limit saprotrophic  
571 communities. Our findings highlight that ecosystem responses to eCO<sub>2</sub> with P limitation are  
572 different from those reported for N-limited systems and therefore, inferences of the behaviour  
573 of P-limited ecosystems based on current knowledge about N-limited ecosystems are not  
574 ideal. Moreover, our results also contribute to the current gap in knowledge regarding the  
575 impacts of soil C cycling with low P availability exposed to eCO<sub>2</sub> conditions.

## 576 **5. Acknowledgements**

577 We thank Gavin McKenzie and Goran Lopaticki for their help with the chamber set up,  
578 maintenance and troubleshooting for the duration of this experiment. Thanks to Pushpinder  
579 Matta and Christopher Mitchell for their help with nutrient analyses and to Johanna Pihlblad  
580 and Johanna Wong- Bajracharya for their assistance during the harvest of this experiment and  
581 sample processing.

## 582 **References**

- 583 Ainsworth, E.A., Long, S.P., 2004. What have we learned from 15 years of free-air CO<sub>2</sub>  
584 enrichment (FACE)? A meta-analytic review of the responses of photosynthesis,  
585 canopy properties and plant production to rising CO<sub>2</sub>: Tansley review. *New*  
586 *Phytologist* 165, 351–372. doi:10.1111/j.1469-8137.2004.01224.x
- 587 Alberton, O., Kuyper, T.W., Gorissen, A., 2005. Taking mycocentrism seriously: mycorrhizal  
588 fungal and plant responses to elevated CO<sub>2</sub>. *New Phytologist* 167, 859–868.  
589 doi:10.1111/j.1469-8137.2005.01458.x
- 590 Baslam, M., Erice, G., Goicoechea, N., 2012. Impact of arbuscular mycorrhizal fungi (AMF)  
591 and atmospheric CO<sub>2</sub> concentration on the biomass production and partitioning in the  
592 forage legume alfalfa. *Symbiosis* 58, 171–181. doi:10.1007/s13199-012-0199-6

- 593 Brar, G.S., Tolleson, E.L., 1975. The luxury uptake phenomenon for removal of phosphates  
594 from municipal wastewater. *Water Research* 9, 71–77. doi:10.1016/0043-  
595 1354(75)90154-2
- 596 Brundett, M., Australian Centre for International Agricultural Research (Eds.), 1995.  
597 Mycorrhizas for plantation forestry in Asia: proceedings of an international  
598 symposium and workshop, Kaiping, Guangdong Province, P.R. China 7 - 11  
599 November, 1994, ACIAR proceedings. Canberra.
- 600 Buyer, J.S., Sasser, M., 2012. High throughput phospholipid fatty acid analysis of soils.  
601 *Applied Soil Ecology, Microorganisms and the Sustainable Management of Soil* 61,  
602 127–130. doi:10.1016/j.apsoil.2012.06.005
- 603 Canadell, J.G., Pitelka, L.F., Ingram, J.S.I., 1995. The effects of elevated [CO<sub>2</sub>] on plant-soil  
604 carbon below-ground: A summary and synthesis. *Plant and Soil* 187, 391–400.  
605 doi:10.1007/BF00017102
- 606 Carrillo, Y., Dijkstra, F.A., LeCain, D., Pendall, E., 2015. Mediation of soil C decomposition  
607 by arbuscular mycorrhizal fungi in grass rhizospheres under elevated CO<sub>2</sub>.  
608 *Biogeochemistry*. doi:10.1007/s10533-015-0159-3
- 609 Carrillo, Y., Dijkstra, F.A., Pendall, E., LeCain, D., Tucker, C., 2014. Plant rhizosphere  
610 influence on microbial C metabolism: the role of elevated CO<sub>2</sub>, N availability and  
611 root stoichiometry. *Biogeochemistry* 117, 229–240. doi:10.1007/s10533-014-9954-5
- 612 Castañeda-Gómez, L., Walker, J.K.M., Powell, J.R., Ellsworth, D.S., Pendall, E., Carrillo, Y.,  
613 2020. Impacts of elevated carbon dioxide on carbon gains and losses from soil and  
614 associated microbes in a Eucalyptus woodland. *Soil Biology and Biochemistry* 143,  
615 107734. doi:10.1016/j.soilbio.2020.107734
- 616 Cavagnaro, T.R., Gleadow, R.M., Miller, R.E., 2011. Plant nutrient acquisition and utilisation  
617 in a high carbon dioxide world. *Functional Plant Biology* 38, 87–96.  
618 doi:10.1071/FP10124
- 619 Cheng, L., Booker, F.L., Tu, C., Burkey, K.O., Zhou, L., Shew, H.D., Ruffy, T.W., Hu, S.,  
620 2012. Arbuscular Mycorrhizal Fungi Increase Organic Carbon Decomposition Under  
621 Elevated CO<sub>2</sub>. *Science* 337, 1084–1087. doi:10.1126/science.1224304
- 622 Cheng, W., Dijkstra, F.A., 2007. Theoretical Proof and Empirical Confirmation of a  
623 Continuous Labeling Method Using Naturally <sup>13</sup>C-Depleted Carbon Dioxide. *Journal*  
624 *of Integrative Plant Biology* 49, 401–407.
- 625 Cheng, W., Johnson, D.W., 1998. Elevated CO<sub>2</sub>, rhizosphere processes, and soil organic  
626 matter decomposition 202, 167–174.
- 627 Clark, C.E.F., Mitchell, M.L., Islam, M.R., Jacobs, B., 2014. Phosphorus content of the soil  
628 influences the growth and productivity of *Themeda triandra* Forssk. and *Microlaena*  
629 *stipoides* (Labill.) R.Br. *The Rangeland Journal* 36, 233–237. doi:10.1071/RJ13108
- 630 Cleveland, C.C., Reed, S.C., Townsend, A.R., 2006. Nutrient Regulation of Organic Matter  
631 Decomposition in a Tropical Rain Forest. *Ecology* 87, 492–503. doi:10.1890/05-0525
- 632 Conroy, J.P., Milham, P.J., Barlow, E.W.R., 1992. Effect of nitrogen and phosphorus  
633 availability on the growth response of *Eucalyptus grandis* to high CO<sub>2</sub>. *Plant, Cell &*  
634 *Environment* 15, 843–847. doi:10.1111/j.1365-3040.1992.tb02152.x
- 635 Cotrufo, M.F., Gorissen, A., 1997. Elevated CO<sub>2</sub> enhances below-ground C allocation in  
636 three perennial grass species at different levels of N availability. *New Phytologist*  
637 137, 421–431. doi:10.1046/j.1469-8137.1997.00839.x
- 638 Crous, K.Y., Ósvaldsson, A., Ellsworth, D.S., 2015. Is phosphorus limiting in a mature  
639 *Eucalyptus* woodland? Phosphorus fertilisation stimulates stem growth. *Plant and Soil*  
640 391, 293–305. doi:10.1007/s11104-015-2426-4
- 641 Datta, S., Taghvaeian, S., Stivers, J., 2017. *Understanding Soil Water Content and*  
642 *Thresholds for Irrigation Management* (No. BAE-1537).

- 643 Davidson, E.A., Verchot, L.V., Cattânio, J.H., Ackerman, I.L., Carvalho, J.E.M., 2000.  
644 Effects of soil water content on soil respiration in forests and cattle pastures of eastern  
645 Amazonia. *Biogeochemistry* 48, 53–69. doi:10.1023/A:1006204113917
- 646 De Graaff, M.-A., Groenigen, K.-J.V., Six, J., Hungate, B., Kessel, C.V., 2006. Interactions  
647 between plant growth and soil nutrient cycling under elevated CO<sub>2</sub>: a meta-analysis.  
648 *Global Change Biology* 12, 2077–2091. doi:10.1111/j.1365-2486.2006.01240.x
- 649 Delucia, E.H., Callaway, R.M., Thomas, E.M., Schlesinger, W.H., 1997. Mechanisms of  
650 Phosphorus Acquisition for Ponderosa Pine Seedlings under High CO<sub>2</sub> and  
651 Temperature. *Annals of Botany* 79, 111–120. doi:10.1006/anbo.1996.0320
- 652 Deng, Q., Hui, D., Luo, Y., Elser, J., Wang, Y.-P., Loladze, I., Zhang, Q., Dennis, S., 2015.  
653 Down-regulation of tissue N:P ratios in terrestrial plants by elevated CO<sub>2</sub>. *Ecology*  
654 96, 3354–3362. doi:10.1890/15-0217.1
- 655 Dieleman, W.I.J., Luysaert, S., Rey, A., Angelis, P.D., Barton, C.V.M., Broadmeadow,  
656 M.S.J., Broadmeadow, S.B., Chigwerewe, K.S., Crookshanks, M., Dufrière, E., Jarvis,  
657 P.G., Kasurinen, A., Kellomäki, S., Dantec, V.L., Liberloo, M., Marek, M., Medlyn,  
658 B., Pokorný, R., Scarascia-Mugnozza, G., Temperton, V.M., Tingey, D., Urban, O.,  
659 Ceulemans, R., Janssens, I.A., 2010. Soil [N] modulates soil C cycling in CO<sub>2</sub>-  
660 fumigated tree stands: a meta-analysis. *Plant, Cell & Environment* 33, 2001–2011.  
661 doi:10.1111/j.1365-3040.2010.02201.x
- 662 Dijkstra, F.A., Carrillo, Y., Pendall, E., Morgan, J.A., 2013. Rhizosphere priming: a nutrient  
663 perspective. *Frontiers in Microbiology* 4. doi:10.3389/fmicb.2013.00216
- 664 Dijkstra, F.A., Pendall, E., Morgan, J.A., Blumenthal, D.M., Carrillo, Y., LeCain, D.R.,  
665 Follett, R.F., Williams, D.G., 2012. Climate change alters stoichiometry of  
666 phosphorus and nitrogen in a semiarid grassland. *New Phytologist* 196, 807–815.  
667 doi:10.1111/j.1469-8137.2012.04349.x
- 668 Dong, Y., Wang, Z., Sun, H., Yang, W., Xu, H., 2018. The Response Patterns of Arbuscular  
669 Mycorrhizal and Ectomycorrhizal Symbionts Under Elevated CO<sub>2</sub>: A Meta-Analysis.  
670 *Frontiers in Microbiology* 9, 1248. doi:10.3389/fmicb.2018.01248
- 671 Drake, J.E., Gallet-Budynek, A., Hofmockel, K.S., Bernhardt, E.S., Billings, S.A., Jackson,  
672 R.B., Johnsen, K.S., Lichter, J., McCarthy, H.R., McCormack, M.L., Moore, D.J.P.,  
673 Oren, R., Palmroth, S., Phillips, R.P., Pippen, J.S., Pritchard, S.G., Treseder, K.K.,  
674 Schlesinger, W.H., DeLucia, E.H., Finzi, A.C., 2011. Increases in the flux of carbon  
675 belowground stimulate nitrogen uptake and sustain the long-term enhancement of  
676 forest productivity under elevated CO<sub>2</sub>. *Ecology Letters* 14, 349–357.  
677 doi:10.1111/j.1461-0248.2011.01593.x
- 678 Drake, J.E., Macdonald, C.A., Tjoelker, M.G., Crous, K.Y., Gimeno, T.E., Singh, B.K.,  
679 Reich, P.B., Anderson, I.C., Ellsworth, D.S., 2016. Short-term carbon cycling  
680 responses of a mature eucalypt woodland to gradual stepwise enrichment of  
681 atmospheric CO<sub>2</sub> concentration. *Global Change Biology* 22, 380–390.  
682 doi:10.1111/gcb.13109
- 683 Easton, Z.M., Bock, E., 2016. Soil and Soil Water Relationships (No. BSE-194P).
- 684 Ellsworth, D.S., Anderson, I.C., Crous, K.Y., Cooke, J., Drake, J.E., Gherlenda, A.N.,  
685 Gimeno, T.E., Macdonald, C.A., Medlyn, B.E., Powell, J.R., Tjoelker, M.G., Reich,  
686 P.B., 2017. Elevated CO<sub>2</sub> does not increase eucalypt forest productivity on a low-  
687 phosphorus soil. *Nature Climate Change* 7, 279–282. doi:10.1038/nclimate3235
- 688 Fang, X.-M., Zhang, X.-L., Chen, F.-S., Zong, Y.-Y., Bu, W.-S., Wan, S.-Z., Luo, Y., Wang,  
689 H., 2019. Phosphorus addition alters the response of soil organic carbon  
690 decomposition to nitrogen deposition in a subtropical forest. *Soil Biology and*  
691 *Biochemistry* 133, 119–128. doi:10.1016/j.soilbio.2019.03.005



- 692 Feng, J., Zhu, B., 2019. A global meta-analysis of soil respiration and its components in  
693 response to phosphorus addition. *Soil Biology and Biochemistry* 135, 38–47.  
694 doi:10.1016/j.soilbio.2019.04.008
- 695 Finzi, A.C., Austin, A.T., Cleland, E.E., Frey, S.D., Houlton, B.Z., Wallenstein, M.D., 2011.  
696 Responses and feedbacks of coupled biogeochemical cycles to climate change:  
697 examples from terrestrial ecosystems. *Frontiers in Ecology and the Environment* 9,  
698 61–67. doi:10.1890/100001
- 699 Finzi, A.C., Sinsabaugh, R.L., Long, T.M., Osgood, M.P., 2006. Microbial Community  
700 Responses to Atmospheric Carbon Dioxide Enrichment in a Warm-Temperate Forest.  
701 *Ecosystems* 9, 215–226. doi:10.1007/s10021-005-0078-6
- 702 Fox, T.R., Miller, B.W., Rubilar, R., Stape, J.L., Albaugh, T.J., 2011. Phosphorus Nutrition  
703 of Forest Plantations: The Role of Inorganic and Organic Phosphorus, in: Bünemann,  
704 E., Oberson, A., Frossard, E. (Eds.), *Phosphorus in Action: Biological Processes in*  
705 *Soil Phosphorus Cycling*, Soil Biology. Springer Berlin Heidelberg, Berlin,  
706 Heidelberg, pp. 317–338. doi:10.1007/978-3-642-15271-9\_13
- 707 Fransson, P.M.A., Johansson, E.M., 2010. Elevated CO<sub>2</sub> and nitrogen influence exudation of  
708 soluble organic compounds by ectomycorrhizal root systems. *FEMS Microbiology*  
709 *Ecology* 71, 186–196. doi:10.1111/j.1574-6941.2009.00795.x
- 710 Freeman, C., Fenner, N., Ostle, N.J., Kang, H., Dowrick, D.J., Reynolds, B., Lock, M.A.,  
711 Sleep, D., Hughes, S., Hudson, J., 2004. Export of dissolved organic carbon from  
712 peatlands under elevated carbon dioxide levels. *Nature* 430, 195–198.  
713 doi:10.1038/nature02707
- 714 Frey, S.D., 2019. Mycorrhizal Fungi as Mediators of Soil Organic Matter Dynamics. *Annual*  
715 *Review of Ecology, Evolution, and Systematics* 50, 237–259. doi:10.1146/annurev-  
716 ecolsys-110617-062331
- 717 Ghosal, P., Chakraborty, T., 2012. Comparative Solubility Study of Four Phosphatic  
718 Fertilizers in Different Solvents and the Effect of Soil. *Resources and Environment* 2,  
719 175–179. doi:10.5923/j.re.20120204.07
- 720 Gifford, R.M., Barrett, D.J., Lutze, J.L., 2000. The effects of elevated [CO<sub>2</sub>] on the C:N and  
721 C:P mass ratios of plant tissues. *Plant and Soil* 224, 1–14.  
722 doi:10.1023/A:1004790612630
- 723 Goll, D.S., Brovkin, V., Parida, B.R., Reick, C.H., Kattge, J., Reich, P.B., van Bodegom,  
724 P.M., Niinemets, ü., 2012. Nutrient limitation reduces land carbon uptake in  
725 simulations with a model of combined carbon, nitrogen and phosphorus cycling.  
726 *Biogeosciences* 9, 3547–3569. doi:10.5194/bg-9-3547-2012
- 727 Hagedorn, F., Blaser, P., Siegwolf, R., 2002. Elevated atmospheric CO<sub>2</sub> and increased N  
728 deposition effects on dissolved organic carbon—clues from  $\delta^{13}\text{C}$  signature. *Soil*  
729 *Biology and Biochemistry* 34, 355–366. doi:10.1016/S0038-0717(01)00191-2
- 730 Hagedorn, F., Hees, P.A.W. van, Handa, I.T., Hättenschwiler, S., 2008. Elevated atmospheric  
731 CO<sub>2</sub> fuels leaching of old dissolved organic matter at the alpine treeline. *Global*  
732 *Biogeochemical Cycles* 22. doi:10.1029/2007GB003026
- 733 Hasegawa, S., Macdonald, C.A., Power, S.A., 2016. Elevated carbon dioxide increases soil  
734 nitrogen and phosphorus availability in a phosphorus-limited Eucalyptus woodland.  
735 *Global Change Biology* 22, 1628–1643.
- 736 Hashimoto, S., Komatsu, H., 2006. Relationships between soil CO<sub>2</sub> concentration and CO<sub>2</sub>  
737 production, temperature, water content, and gas diffusivity: implications for field  
738 studies through sensitivity analyses. *Journal of Forest Research* 11, 41–50.  
739 doi:10.1007/s10310-005-0185-4



- 740 Hill, J.O., Simpson, R.J., Ryan, M.H., Chapman, D.F., 2010. Root hair morphology and  
741 mycorrhizal colonisation of pasture species in response to phosphorus and nitrogen  
742 nutrition. *Crop and Pasture Science* 61, 122. doi:10.1071/CP09217
- 743 Högy, P., Keck, M., Niehaus, K., Franzaring, J., Fangmeier, A., 2010. Effects of atmospheric  
744 CO<sub>2</sub> enrichment on biomass, yield and low molecular weight metabolites in wheat  
745 grain. *Journal of Cereal Science* 52, 215–220. doi:10.1016/j.jcs.2010.05.009
- 746 Hoosbeek, M.R., Lukac, M., Dam, D. van, Godbold, D.L., Velthorst, E.J., Biondi, F.A.,  
747 Peressotti, A., Cotrufo, M.F., Angelis, P. de, Scarascia-Mugnozza, G., 2004. More  
748 new carbon in the mineral soil of a poplar plantation under Free Air Carbon  
749 Enrichment (POPFACE): Cause of increased priming effect? *Global Biogeochemical*  
750 *Cycles* 18. doi:10.1029/2003GB002127
- 751 Hungate, B.A., Groenigen, K.-J.V., Six, J., Jastrow, J.D., Luo, Y., Graaff, M.-A.D., Kessel,  
752 C.V., Osenberg, C.W., 2009. Assessing the effect of elevated carbon dioxide on soil  
753 carbon: a comparison of four meta-analyses. *Global Change Biology* 15, 2020–2034.  
754 doi:10.1111/j.1365-2486.2009.01866.x
- 755 Javot, H., Pumplin, N., Harrison, M.J., 2007. Phosphate in the arbuscular mycorrhizal  
756 symbiosis: transport properties and regulatory roles: Phosphate transport in the AM  
757 symbiosis. *Plant, Cell & Environment* 30, 310–322. doi:10.1111/j.1365-  
758 3040.2006.01617.x
- 759 Jiang, M., Caldararu, S., Zhang, H., Fleischer, K., Crous, K.Y., Yang, J., Kauwe, M.G.D.,  
760 Ellsworth, D.S., Reich, P.B., Tissue, D.T., Zaehle, S., Medlyn, B.E., 2020. Low  
761 phosphorus supply constrains plant responses to elevated CO<sub>2</sub>: A meta-analysis.  
762 *Global Change Biology* 26, 5856–5873. doi:https://doi.org/10.1111/gcb.15277
- 763 Jin, J., Tang, C., Sale, P., 2015. The impact of elevated carbon dioxide on the phosphorus  
764 nutrition of plants: a review. *Annals of Botany* 116, 987–999.  
765 doi:10.1093/aob/mcv088
- 766 Jing, Z., Chen, R., Wei, S., Feng, Y., Zhang, J., Lin, X., 2017. Response and feedback of C  
767 mineralization to P availability driven by soil microorganisms. *Soil Biology and*  
768 *Biochemistry* 105, 111–120. doi:10.1016/j.soilbio.2016.11.014
- 769 Johnson, A.H., Frizano, J., Vann, D.R., 2003. Biogeochemical implications of labile  
770 phosphorus in forest soils determined by the Hedley fractionation procedure.  
771 *Oecologia* 135, 487–499. doi:10.1007/s00442-002-1164-5
- 772 Joner, E.J., van Aarle, I.M., Vosatka, M., 2000. Phosphatase activity of extra-radical  
773 arbuscular mycorrhizal hyphae: A review. *Plant and Soil* 226, 12.
- 774 Keenan, R.J., Reams, G.A., Achard, F., de Freitas, J.V., Grainger, A., Lindquist, E., 2015.  
775 Dynamics of global forest area: Results from the FAO Global Forest Resources  
776 Assessment 2015. *Forest Ecology and Management, Changes in Global Forest*  
777 *Resources from 1990 to 2015* 352, 9–20. doi:10.1016/j.foreco.2015.06.014
- 778 Kelley, A.M., Fay, P.A., Polley, H.W., Gill, R.A., Jackson, R.B., 2011. Atmospheric CO<sub>2</sub> and  
779 soil extracellular enzyme activity: a meta-analysis and CO<sub>2</sub> gradient experiment.  
780 *Ecosphere* 2, art96. doi:10.1890/ES11-00117.1
- 781 Kindler, R., Siemens, J., Kaiser, K., Walmsley, D.C., Bernhofer, C., Buchmann, N., Cellier,  
782 P., Eugster, W., Gleixner, G., Grünwald, T., Heim, A., Ibrom, A., Jones, S.K., Jones,  
783 M., Klumpp, K., Kutsch, W., Larsen, K.S., Lehuger, S., Loubet, B., McKenzie, R.,  
784 Moors, E., Osborne, B., Pilegaard, K., Reibmann, C., Saunders, M., Schmidt, M.W.I.,  
785 Schrupf, M., Seyfferth, J., Skiba, U., Soussana, J.-F., Sutton, M.A., Tefs, C.,  
786 Vowinckel, B., Zeeman, M.J., Kaupenjohann, M., 2011. Dissolved carbon leaching  
787 from soil is a crucial component of the net ecosystem carbon balance. *Global Change*  
788 *Biology* 17, 1167–1185. doi:10.1111/j.1365-2486.2010.02282.x

- 789 Lenth, R., Singmann, H., Love, J., Buerkner, P., Herve, M., 2020. emmeans: Estimated  
790 Marginal Means, aka Least-Squares Means.
- 791 Liu, Y., Chen, J., 2008. Phosphorus Cycle, in: Jørgensen, S.E., Fath, B.D. (Eds.),  
792 Encyclopedia of Ecology. Academic Press, Oxford, pp. 2715–2724.  
793 doi:10.1016/B978-008045405-4.00754-0
- 794 Liu, Y., Zang, H., Ge, T., Bai, J., Lu, S., Zhou, P., Peng, P., Shibistova, O., Zhu, Z., Wu, J.,  
795 Guggenberger, G., 2018. Intensive fertilization (N, P, K, Ca, and S) decreases organic  
796 matter decomposition in paddy soil. *Applied Soil Ecology* 127, 51–57.  
797 doi:10.1016/j.apsoil.2018.02.012
- 798 Loladze, I., 2014. Hidden shift of the ionome of plants exposed to elevated CO<sub>2</sub> depletes  
799 minerals at the base of human nutrition. *ELife* 3. doi:10.7554/eLife.02245
- 800 Loladze, I., 2002. Rising atmospheric CO<sub>2</sub> and human nutrition: toward globally imbalanced  
801 plant stoichiometry? *Trends in Ecology & Evolution* 17, 457–461.  
802 doi:10.1016/S0169-5347(02)02587-9
- 803 Lukac, M., Calfapietra, C., Godbold, D.L., 2003. Production, turnover and mycorrhizal  
804 colonization of root systems of three *Populus* species grown under elevated CO<sub>2</sub>  
805 (POPFACE). *Global Change Biology* 9, 838–848. doi:10.1046/j.1365-  
806 2486.2003.00582.x
- 807 Maier, M., Schack-Kirchner, H., 2014. Using the gradient method to determine soil gas flux:  
808 A review. *Agricultural and Forest Meteorology* 192–193, 78–95.  
809 doi:10.1016/j.agrformet.2014.03.006
- 810 Maroco, J.P., Breia, E., Faria, T., Pereira, J.S., Chaves, M.M., 2002. Effects of long-term  
811 exposure to elevated CO<sub>2</sub> and N fertilization on the development of photosynthetic  
812 capacity and biomass accumulation in *Quercus suber* L. *Plant, Cell & Environment*  
813 25, 105–113. doi:10.1046/j.0016-8025.2001.00800.x
- 814 Matamala, R., Schlesinger, W.H., 2000. Effects of elevated atmospheric CO<sub>2</sub> on fine root  
815 production and activity in an intact temperate forest ecosystem. *Global Change*  
816 *Biology* 6, 967–979. doi:10.1046/j.1365-2486.2000.00374.x
- 817 McGill, W.B., Cole, C.V., 1981. Comparative aspects of cycling of organic C, N, S and P  
818 through soil organic matter. *Geoderma* 26, 267–286. doi:10.1016/0016-  
819 7061(81)90024-0
- 820 Mohan, J.E., Cowden, C.C., Baas, P., Dawadi, A., Frankson, P.T., Helmick, K., Hughes, E.,  
821 Khan, S., Lang, A., Machmuller, M., Taylor, M., Witt, C.A., 2014. Mycorrhizal fungi  
822 mediation of terrestrial ecosystem responses to global change: mini-review. *Fungal*  
823 *Ecology* 10, 3–19. doi:10.1016/j.funeco.2014.01.005
- 824 Moorhead, D.L., Linkins, A.E., 1997. Elevated CO<sub>2</sub> alters belowground exoenzyme activities  
825 in tussock tundra. *Plant and Soil* 189, 321–329. doi:10.1023/A:1004246720186
- 826 Mori, T., Lu, X., Aoyagi, R., Mo, J., 2018. Reconsidering the phosphorus limitation of soil  
827 microbial activity in tropical forests. *Functional Ecology* 32, 1145–1154.  
828 doi:10.1111/1365-2435.13043
- 829 Mullen, M.D., 2005. PHOSPHORUS IN SOILS | Biological Interactions, in: Hillel, D. (Ed.),  
830 Encyclopedia of Soils in the Environment. Elsevier, Oxford, pp. 210–216.  
831 doi:10.1016/B0-12-348530-4/00161-2
- 832 Mullins, G.L., Sikora, F.J., Williams, J.C., 1995. Effect of Water-Soluble Phosphorus on the  
833 Effectiveness of Triple Superphosphate Fertilizers. *Soil Science Society of America*  
834 *Journal* 59, 256–260. doi:10.2136/sssaj1995.03615995005900010040x
- 835 Nie, Z.N., Zollinger, R.P., Jacobs, J.L., 2009. Performance of 7 Australian native grasses  
836 from the temperate zone under a range of cutting and fertiliser regimes. *Crop and*  
837 *Pasture Science* 60, 943. doi:10.1071/CP09067

- 838 Nielsen, U.N., Prior, S., Delroy, B., Walker, J.K.M., Ellsworth, D.S., Powell, J.R., 2015.  
839 Response of belowground communities to short-term phosphorus addition in a  
840 phosphorus-limited woodland. *Plant and Soil* 391, 321–331. doi:10.1007/s11104-015-  
841 2432-6
- 842 Norby, R.J., Kauwe, M.G.D., Domingues, T.F., Duursma, R.A., Ellsworth, D.S., Goll, D.S.,  
843 Lapola, D.M., Luus, K.A., MacKenzie, A.R., Medlyn, B.E., Pavlick, R., Rammig, A.,  
844 Smith, B., Thomas, R., Thonicke, K., Walker, A.P., Yang, X., Zaehle, S., 2015.  
845 Model–data synthesis for the next generation of forest free-air CO<sub>2</sub> enrichment  
846 (FACE) experiments. *New Phytologist* 209, 17–28. doi:10.1111/nph.13593
- 847 Olsson, P.A., 1999. Signature fatty acids provide tools for determination of the distribution  
848 and interactions of mycorrhizal fungi in soil. *FEMS Microbiology Ecology* 29, 303–  
849 310.
- 850 Pan, Y., Birdsey, R.A., Fang, J., Houghton, R., Kauppi, P.E., Kurz, W.A., Phillips, O.L.,  
851 Shvidenko, A., Lewis, S.L., Canadell, J.G., Ciais, P., Jackson, R.B., Pacala, S.W.,  
852 McGuire, A.D., Piao, S., Rautiainen, A., Sitch, S., Hayes, D., 2011. A Large and  
853 Persistent Carbon Sink in the World’s Forests. *Science* 333, 988–993.  
854 doi:10.1126/science.1201609
- 855 Pausch, J., Kuzyakov, Y., 2018. Carbon input by roots into the soil: Quantification of  
856 rhizodeposition from root to ecosystem scale. *Global Change Biology* 24, 1–12.  
857 doi:10.1111/gcb.13850
- 858 Peñuelas, J., Sardans, J., Rivas-ubach, A., Janssens, I.A., 2012. The human-induced  
859 imbalance between C, N and P in Earth’s life system. *Global Change Biology* 18, 3–  
860 6. doi:10.1111/j.1365-2486.2011.02568.x
- 861 Phillips, R.P., Finzi, A.C., Bernhardt, E.S., 2011. Enhanced root exudation induces microbial  
862 feedbacks to N cycling in a pine forest under long-term CO<sub>2</sub> fumigation. *Ecology*  
863 *Letters* 14, 187–194. doi:10.1111/j.1461-0248.2010.01570.x
- 864 Phillips, R.P., Meier, I.C., Bernhardt, E.S., Grandy, A.S., Wickings, K., Finzi, A.C., 2012.  
865 Roots and fungi accelerate carbon and nitrogen cycling in forests exposed to elevated  
866 CO<sub>2</sub>. *Ecology Letters* 15, 1042–1049. doi:10.1111/j.1461-0248.2012.01827.x
- 867 Piñeiro, J., Ochoa-Hueso, R., Delgado-Baquerizo, M., Dobrick, S., Reich, P.B., Pendall, E.,  
868 Power, S.A., 2017. Effects of elevated CO<sub>2</sub> on fine root biomass are reduced by  
869 aridity but enhanced by soil nitrogen: A global assessment. *Scientific Reports* 7.  
870 doi:10.1038/s41598-017-15728-4
- 871 Rayment, G.E., Lyons, D.J., Shelley, B., 2010. *Soil Chemical Methods: Australasia*. CSIRO  
872 PUBLISHING, Victoria, AUSTRALIA.
- 873 Reed, S.C., Townsend, A.R., Taylor, P.G., Cleveland, C.C., 2011. Phosphorus Cycling in  
874 Tropical Forests Growing on Highly Weathered Soils, in: Bünemann, E., Oberson, A.,  
875 Frossard, E. (Eds.), *Phosphorus in Action: Biological Processes in Soil Phosphorus*  
876 *Cycling, Soil Biology*. Springer Berlin Heidelberg, Berlin, Heidelberg, pp. 339–369.  
877 doi:10.1007/978-3-642-15271-9\_14
- 878 Reed, S.C., Yang, X., Thornton, P.E., 2015. Incorporating phosphorus cycling into global  
879 modeling efforts: a worthwhile, tractable endeavor. *New Phytologist* 208, 324–329.  
880 doi:10.1111/nph.13521
- 881 Reich, P.B., Hobbie, S.E., Lee, T., Ellsworth, D.S., West, J.B., Tilman, D., Knops, J.M.H.,  
882 Naeem, S., Trost, J., 2006. Nitrogen limitation constrains sustainability of ecosystem  
883 response to CO<sub>2</sub>. *Nature* 440, 922–925. doi:10.1038/nature04486
- 884 Reich, P.B., Hobbie, S.E., Lee, T.D., 2014. Plant growth enhancement by elevated CO<sub>2</sub>  
885 eliminated by joint water and nitrogen limitation. *Nature Geoscience* 7, 920–924.  
886 doi:10.1038/ngeo2284

- 887 Robinson, J., Munnich, D., Simpson, P., Orchard, P., 1993. Pasture Associations and Their  
888 Relation to Environment and Agronomy in the Goulburn District. *Australian Journal*  
889 *of Botany* 41, 627. doi:10.1071/BT9930627
- 890 Ross, G.M., Horn, S., Macdonald, C.A., Powell, J.R., Reynolds, J.K., Ryan, M.M., Cook,  
891 J.M., Nielsen, U.N., 2020. Metabarcoding mites: Three years of elevated CO<sub>2</sub> has no  
892 effect on oribatid assemblages in a Eucalyptus woodland. *Pedobiologia* (in press).
- 893 Sato, T., Ezawa, T., Cheng, W., Tawaraya, K., 2015. Release of acid phosphatase from  
894 extraradical hyphae of arbuscular mycorrhizal fungus *Rhizophagus clarus*. *Soil*  
895 *Science and Plant Nutrition* 61, 269–274. doi:10.1080/00380768.2014.993298
- 896 Sharma, S.B., Sayyed, R.Z., Trivedi, M.H., Gobi, T.A., 2013. Phosphate solubilizing  
897 microbes: sustainable approach for managing phosphorus deficiency in agricultural  
898 soils. *SpringerPlus* 2. doi:10.1186/2193-1801-2-587
- 899 Smith, S.E., Jakobsen, I., Grønlund, M., Smith, F.A., 2011. Roles of Arbuscular Mycorrhizas  
900 in Plant Phosphorus Nutrition: Interactions between Pathways of Phosphorus Uptake  
901 in Arbuscular Mycorrhizal Roots Have Important Implications for Understanding and  
902 Manipulating Plant Phosphorus Acquisition. *Plant Physiology* 156, 1050–1057.  
903 doi:10.1104/pp.111.174581
- 904 Soepadmo, E., 1993. Tropical rain forests as carbon sinks. *Chemosphere* 27, 1025–1039.  
905 doi:10.1016/0045-6535(93)90066-E
- 906 Soka, G., Ritchie, M., 2014. Arbuscular mycorrhizal symbiosis and ecosystem processes:  
907 Prospects for future research in tropical soils. *Open Journal of Ecology* 04, 11–22.  
908 doi:10.4236/oje.2014.41002
- 909 Soong, J.L., Marañón-Jimenez, S., Cotrufo, M.F., Boeckx, P., Bodé, S., Guenet, B., Peñuelas,  
910 J., Richter, A., Stahl, C., Verbruggen, E., Janssens, I.A., 2018. Soil microbial CNP  
911 and respiration responses to organic matter and nutrient additions: Evidence from a  
912 tropical soil incubation. *Soil Biology and Biochemistry* 122, 141–149.  
913 doi:10.1016/j.soilbio.2018.04.011
- 914 Souza, R.C., Solly, E.F., Dawes, M.A., Graf, F., Hagedorn, F., Egli, S., Clement, C.R., Nagy,  
915 L., Rixen, C., Peter, M., 2017. Responses of soil extracellular enzyme activities to  
916 experimental warming and CO<sub>2</sub> enrichment at the alpine treeline. *Plant and Soil* 416,  
917 527–537. doi:10.1007/s11104-017-3235-8
- 918 Sun, Y., Peng, S., Goll, D.S., Ciais, P., Guenet, B., Guimberteau, M., Hinsinger, P., Janssens,  
919 I.A., Peñuelas, J., Piao, S., Poulter, B., Violette, A., Yang, X., Yin, Y., Zeng, H.,  
920 2017. Diagnosing phosphorus limitations in natural terrestrial ecosystems in carbon  
921 cycle models. *Earth's Future* 5, 730–749. doi:10.1002/2016EF000472
- 922 Talbot, J.M., Allison, S.D., Treseder, K.K., 2008. Decomposers in disguise: mycorrhizal  
923 fungi as regulators of soil C dynamics in ecosystems under global change. *Functional*  
924 *Ecology* 22, 955–963. doi:10.1111/j.1365-2435.2008.01402.x
- 925 Tarnawski, S., Aragno, M., 2006. The Influence of Elevated [CO<sub>2</sub>] on Diversity, Activity and  
926 Biogeochemical Functions of Rhizosphere and Soil Bacterial Communities, in:  
927 Nösberger, J., Long, S.P., Norby, R.J., Stitt, M., Hendrey, G.R., Blum, H. (Eds.),  
928 *Managed Ecosystems and CO<sub>2</sub>*. Springer-Verlag, Berlin/Heidelberg, pp. 393–412.  
929 doi:10.1007/3-540-31237-4\_22
- 930 Tate, K.R., 1984. The biological transformation of P in soil. *Plant and Soil* 76, 245–256.  
931 doi:10.1007/BF02205584
- 932 Terrer, C., Jackson, R.B., Prentice, I.C., Keenan, T.F., Kaiser, C., Vicca, S., Fisher, J.B.,  
933 Reich, P.B., Stocker, B.D., Hungate, B.A., Peñuelas, J., McCallum, I.,  
934 Soudzilovskaia, N.A., Cernusak, L.A., Talhelm, A.F., Sundert, K.V., Piao, S.,  
935 Newton, P.C.D., Hovenden, M.J., Blumenthal, D.M., Liu, Y.Y., Müller, C., Winter,  
936 K., Field, C.B., Viechtbauer, W., Lissa, C.J.V., Hoosbeek, M.R., Watanabe, M.,



- 937 Koike, T., Leshyk, V.O., Polley, H.W., Franklin, O., 2019. Nitrogen and phosphorus  
938 constrain the CO<sub>2</sub> fertilization of global plant biomass. *Nature Climate Change* 9,  
939 684–689. doi:10.1038/s41558-019-0545-2
- 940 Terrer, C., Vicca, S., Hungate, B.A., Phillips, R.P., Prentice, I.C., 2016. Mycorrhizal  
941 association as a primary control of the CO<sub>2</sub> fertilization effect. *Science* 353, 72–74.  
942 doi:10.1126/science.aaf4610
- 943 Treseder, K.K., 2004. A meta-analysis of mycorrhizal responses to nitrogen, phosphorus, and  
944 atmospheric CO<sub>2</sub> in field studies. *New Phytologist* 164, 347–355. doi:10.1111/j.1469-  
945 8137.2004.01159.x
- 946 Treseder, K.K., Allen, M.F., 2002. Direct nitrogen and phosphorus limitation of arbuscular  
947 mycorrhizal fungi: a model and field test. *New Phytologist* 155, 507–515.  
948 doi:10.1046/j.1469-8137.2002.00470.x
- 949 Treseder, K.K., Cross, A., 2006. Global Distributions of Arbuscular Mycorrhizal Fungi.  
950 *Ecosystems* 9, 305–316.
- 951 van Groenigen, K.J., De Graaff, M.-A., Six, J., Harris, D., Kuikman, P., Van Kessel, C.,  
952 2006. The impact of elevated atmospheric [CO<sub>2</sub>] on soil C and N dynamics: a meta-  
953 analysis, in: *Managed Ecosystems and CO<sub>2</sub>*. Springer, pp. 373–391.
- 954 Vance, E.D., Brookes, P.C., Jenkinson, D.S., 1987. An extraction method for measuring soil  
955 microbial biomass C. *Soil Biology & Biochemistry* 19, 703–707.
- 956 Vitousek, P.M., Porder, S., Houlton, B.Z., Chadwick, O.A., 2010. Terrestrial phosphorus  
957 limitation: mechanisms, implications, and nitrogen–phosphorus interactions.  
958 *Ecological Applications* 20, 5–15. doi:10.1890/08-0127.1
- 959 Watt, M., Evans, J.R., 1999. Linking Development and Determinacy with Organic Acid  
960 Efflux from Proteoid Roots of White Lupin Grown with Low Phosphorus and  
961 Ambient or Elevated Atmospheric CO<sub>2</sub> Concentration. *Plant Physiology* 120, 705–  
962 716.
- 963 Wei, L., Vosátka, M., Cai, B., Ding, J., Lu, C., Xu, J., Yan, W., Li, Y., Liu, C., 2019. The  
964 Role of Arbuscular Mycorrhiza Fungi in the Decomposition of Fresh Residue and  
965 Soil Organic Carbon: A Mini-Review. *Soil Science Society of America Journal* 83,  
966 511–517. doi:10.2136/sssaj2018.05.0205
- 967 Willis, A., Rodrigues, B.F., Harris, P.J.C., 2013. The Ecology of Arbuscular Mycorrhizal  
968 Fungi. *Critical Reviews in Plant Sciences* 32, 1–20.  
969 doi:10.1080/07352689.2012.683375
- 970 Xu, J., Liu, S., Song, S., Guo, H., Tang, J., Yong, J.W.H., Ma, Y., Chen, X., 2018.  
971 Arbuscular mycorrhizal fungi influence decomposition and the associated soil  
972 microbial community under different soil phosphorus availability. *Soil Biology and*  
973 *Biochemistry* 120, 181–190. doi:10.1016/j.soilbio.2018.02.010
- 974 Yang, X., Thornton, P.E., Ricciuto, D.M., Hoffman, F.M., 2016. Phosphorus feedbacks  
975 constraining tropical ecosystem responses to changes in atmospheric CO<sub>2</sub> and climate.  
976 *Geophysical Research Letters* 43, 7205–7214. doi:10.1002/2016GL069241
- 977 Yuan, Y., Li, Y., Mou, Z., Kuang, L., Wu, W., Zhang, J., Wang, F., Hui, D., Peñuelas, J.,  
978 Sardans, J., Lambers, H., Wang, J., Kuang, Y., Li, Z., Liu, Z., 2021. Phosphorus  
979 addition decreases microbial residual contribution to soil organic carbon pool in a  
980 tropical coastal forest. *Global Change Biology* 27, 454–466. doi:10.1111/gcb.15407
- 981 Zhang, Q., Wang, Y.P., Matear, R.J., Pitman, A.J., Dai, Y.J., 2014. Nitrogen and  
982 phosphorus limitations significantly reduce future allowable CO<sub>2</sub> emissions.  
983 *Geophysical Research Letters* 41, 632–637. doi:10.1002/2013GL058352
- 984 Zhou, J., Zang, H., Loeppmann, S., Gube, M., Kuzyakov, Y., Pausch, J., 2019. Arbuscular  
985 mycorrhiza enhances rhizodeposition and reduces the rhizosphere priming effect on

986           the decomposition of soil organic matter. *Soil Biology and Biochemistry* 107641.  
987           doi:10.1016/j.soilbio.2019.107641  
988   Zhu, X., Song, F., Liu, S., Liu, F., 2016. Arbuscular mycorrhiza improve growth, nitrogen  
989           uptake, and nitrogen use efficiency in wheat grown under elevated CO<sub>2</sub>. *Mycorrhiza*  
990           26, 133–140. doi:10.1007/s00572-015-0654-3  
991
